# Supplementary material for: Ammonium–crown ether supramolecular cation-templated assembly of an unprecedented heterobicluster–metal coordination polymer with enhanced NLO properties
Source: Royal Society of Chemistry journal article supplement (doi:10.1039/c5cc10076c), 2016-01-01
Supplement: c5cc10076c1.pdf [file c5cc10076c1.pdf]

## Supporting Information

### **Ammonium-Crown Ether Supramolecular Cation-Templated Assembly of an Unprecedented Heterobicluster-Metal Coordination Polymer with Enhanced NLO Properties**

Jinfang Zhang,<sup>a</sup> Ding Jia,<sup>a</sup> Mark G. Humphrey,<sup>b</sup> Suci Meng,<sup>a</sup> Michael J. Zaworotko,<sup>c</sup>  
Marie P. Cifuentes,<sup>b</sup> and Chi Zhang<sup>a</sup>

<sup>a</sup> *China-Australia Joint Research Center for Functional Molecular Materials, School of Chemical and Material Engineering, Jiangnan University, Wuxi 214122, P.R. China*

<sup>b</sup> *Research School of Chemistry, Australian National University, Canberra, ACT 2601, Australia*

<sup>c</sup> *Department of Chemical & Environmental Science, University of Limerick, Limerick, Ireland*

## Table of Contents

|                                                                                                        |            |
|--------------------------------------------------------------------------------------------------------|------------|
| <b>Experimental Section</b> .....                                                                      | <b>S3</b>  |
| <b>Preparation of HCM-CP 1</b> .....                                                                   | <b>S3</b>  |
| <b>X-ray Structure Determination</b> .....                                                             | <b>S3</b>  |
| <b>Computational Details</b> .....                                                                     | <b>S4</b>  |
| <b>Nonlinear Optical Measurements</b> .....                                                            | <b>S4</b>  |
| <b>Results and Discussion</b> .....                                                                    | <b>S5</b>  |
| <b>Synthetic Strategy</b> .....                                                                        | <b>S5</b>  |
| <b>TGA and PXRD Analyses</b> .....                                                                     | <b>S5</b>  |
| <b>Initial Structure-Property Correlations</b> .....                                                   | <b>S6</b>  |
| <b>References</b> .....                                                                                | <b>S6</b>  |
| <b>Scheme S1</b> (Illustrative assembly of the anionic W/S/Cu-containing HCM-CP 1)...                  | <b>S8</b>  |
| <b>Scheme S2</b> (Four-membered rings in the anionic 3-D framework of <b>1</b> ).....                  | <b>S9</b>  |
| <b>Scheme S3</b> (Six-membered rings in the anionic 3-D framework of <b>1</b> ).....                   | <b>S10</b> |
| <b>Scheme S4</b> (Eight-membered rings in the anionic 3-D framework of <b>1</b> ).....                 | <b>S11</b> |
| <b>Figure S1</b> (3-D ball-and-stick packing diagram of <b>1</b> viewed along the <i>b</i> -axis)..... | <b>S12</b> |
| <b>Figure S2</b> (3-D ball-and-stick packing diagram of <b>1</b> viewed along the <i>a</i> -axis)..... | <b>S13</b> |
| <b>Figure S3</b> (Ball-and-stick diagrams of the cations).....                                         | <b>S14</b> |
| <b>Figure S4</b> (TGA curve for <b>1</b> ).....                                                        | <b>S15</b> |
| <b>Figure S5</b> (Experimental and simulated PXRD patterns of <b>1</b> ).....                          | <b>S16</b> |
| <b>Figure S6</b> (Absorption spectra (Expt./Calc.) and peak assignment of <b>1</b> ).....              | <b>S17</b> |
| <b>Figure S7</b> (Z-scan measurement of aniline).....                                                  | <b>S18</b> |
| <b>Figure S8</b> (Z-scan measurement of 18-crown-6).....                                               | <b>S19</b> |
| <b>Figure S9</b> (Z-scan measurement of [(NH <sub>4</sub> )C(18-crown-6)]NO <sub>3</sub> ).....        | <b>S20</b> |
| <b>Table S1</b> (Crystallographic and structural refinement data for HCM-CP <b>1</b> ).....            | <b>S21</b> |
| <b>Table S2.</b> (Mean radii of cations in some related clusters and CPs).....                         | <b>S22</b> |
| <b>Table S3</b> (NLO data of some related polymeric/discrete clusters and CPs).....                    | <b>S23</b> |
| <b>Table S4</b> (Results of TD-DFT calculations) .....                                                 | <b>S27</b> |
| Excitation energies and oscillator strengths.....                                                      | <b>S27</b> |
| Orbital coefficients of atoms corresponding to Peak 1.....                                             | <b>S50</b> |
| Orbital coefficients of atoms corresponding to Peak 2.....                                             | <b>S52</b> |
| Ground-to-excited-state transition electric dipole moments.....                                        | <b>S54</b> |

## Experimental Section:

The reaction and manipulations were conducted using standard Schlenk techniques under an atmosphere of argon. The starting material  $[\text{NH}_4]_2\text{WS}_4$  was obtained according to the literature procedure.<sup>S1</sup> The solvents were carefully dried and distilled prior to use. Other chemicals were commercially available and used as received. Elemental analyses for carbon, hydrogen and nitrogen were performed on a Perkin-Elmer 240C elemental analyzer. Infrared spectra were recorded with a Nicolet FT-170SX Fourier transform spectrometer (KBr pellets). Thermogravimetric analyses were carried out on a TGA/1100SF thermal analyzer at a heating rate of  $10\text{ }^\circ\text{C min}^{-1}$  between 50 and  $1000\text{ }^\circ\text{C}$  under a dinitrogen atmosphere with a flow rate of  $50\text{ cm}^3\text{ min}^{-1}$ . Powder X-ray diffraction (PXRD) patterns were recorded using  $\text{Cu K}\alpha_1$  radiation on a Bruker D8 X-ray diffractometer.

**Preparation of  ${}^3_\infty\{[(\text{NH}_4)\subset(18\text{-crown-6})]_6\cdot 5\text{DMF}\cdot 5\text{CH}_3\text{CN}\cdot \text{H}_2\text{O}\}\subset\{[\text{WS}_4\text{Cu}_3(\text{CN})_2]_2[\text{WS}_4\text{Cu}_3(\text{CN})_2]_2[\text{WS}_4\text{Cu}_4(\text{CN})_3][\text{Cu}(\text{CN})_{1.5}]_2\}$  (HCM-CP 1).**  $[\text{NH}_4]_2\text{WS}_4$  (0.35 g, 1.00 mmol) and  $\text{CuCN}$  (0.27 g, 3.00 mmol) were added to 5 mL DMF and the resultant mixture was stirred for 20 min, affording a solution that was passed through a filter. The orange-red filtrate was carefully layered onto 0.5 mL DMF, and 10 mL of a solution of 18-crown-6 in  $\text{CH}_3\text{CN}$  ( $0.05\text{ mol dm}^{-3}$ ) was in turn added on top. Several days later, HCM-CP 1 was obtained as orange block crystals (yield: 0.22 g, 21% based on W). Anal. Calcd. for  $\text{C}_{111}\text{H}_{220}\text{Cu}_{18}\text{N}_{30}\text{O}_{42}\text{S}_{20}\text{W}_5$ : C, 24.91; H, 4.14; N, 7.85%. Found: C, 25.13; H, 4.01; N, 7.67%. IR (KBr pellets,  $\text{cm}^{-1}$ ): 2146.2(vs) (CN), 1652.8(s) (C=O in DMF), 433.8(s) (W- $\mu_3$ -S).

**X-ray Structure Determination.** A crystal of HCM-CP 1 suitable for a single-crystal X-ray diffraction study was obtained directly from the above preparation. All measurements were made on a Saturn 724+ CCD X-ray diffractometer by using graphite-monochromated  $\text{Mo K}\alpha$  ( $\lambda = 0.71070\text{ \AA}$ ) radiation. The single crystal of HCM-CP 1 was mounted with grease at the top of a glass fibre. Cell parameters were refined on all observed reflections by using the program *Crystalclear* (Rigaku Inc., 2007). The collected data were reduced by the program *Crystalclear* and an absorption correction (multiscan) was applied. The reflection data for HCM-CP 1 were also corrected for Lorentz and polarization effects. The crystal structure of HCM-CP 1 was solved by direct methods and refined on  $F^2$  by full-matrix least-squares methods using the *SHELXTL* software package.<sup>S2</sup> All non-hydrogen atoms

except the disordered atoms were refined anisotropically. A summary of the key crystallographic information is listed in Table S1. More detailed crystallographic data have been given in the cif file. CCDC 967653.

**Computational Details.** Density functional theory (DFT) and time-dependent density functional theory (TD-DFT) calculations were performed to assign the experimental absorption spectra by using the Gaussian 03 program.<sup>S3</sup> A model compound of HCM-CP **1** was derived from the experimental single-crystal X-ray structure. The restricted singlet wave function for HCM-CP **1** in DMF solution (dielectric constant  $\epsilon = 36.71$ ) was shown to be stable within the framework of the polarized continuum model (PCM) at the B3LYP functional/LanL2DZ level of theory. Vertical electronic excitation energies of HCM-CP **1** in DMF solution were then obtained through TD-DFT/PCM calculations at the same level.

**Nonlinear Optical Measurements.** The third-order NLO properties of aniline, 18-crown-6,  $[(\text{NH}_4)\subset(18\text{-crown-6})]\text{NO}_3$ <sup>S4</sup> and HCM-CP **1** were determined by performing Z-scan measurements.<sup>S5</sup> Aniline solvent and the aniline solutions of 18-crown-6,  $[(\text{NH}_4)\subset(18\text{-crown-6})]\text{NO}_3$  and HCM-CP **1** with concentrations of  $1.37 \times 10^{-3} \text{ mol dm}^{-3}$ ,  $1.37 \times 10^{-3} \text{ mol dm}^{-3}$  and  $2.28 \times 10^{-4} \text{ mol dm}^{-3}$ , respectively, were placed in a 5 mm quartz cuvette for the nonlinear optical measurements, which were performed with linearly polarized 5 ns pulses at 532 nm generated from a Q-switched frequency-doubled Nd:YAG laser. Aniline, 18-crown-6,  $[(\text{NH}_4)\subset(18\text{-crown-6})]\text{NO}_3$  and HCM-CP **1** are stable toward air and laser light under the experimental conditions. The spatial profiles of the optical pulses were of nearly Gaussian transverse mode. The pulsed laser was focused onto the sample cell with a 30 cm focal length mirror. The spot radius of the laser beam was measured to be 55  $\mu\text{m}$  (half-width at  $1/e^2$  maximum). The energy of the input and output pulses were measured simultaneously by precision laser detectors (Rjp-735 energy probes), which were linked to a computer by an IEEE interface,<sup>S6</sup> while the incident pulse energy was varied by a Newport Com. Attenuator. The interval between the laser pulses was chosen to be 1 Hz to avoid the influence of thermal and long-term effects. The samples were mounted on a translation stage that was controlled by computer to move along the axis of the incident laser beam (Z-direction) with respect to the focal point. To determine both the sign and magnitude of the nonlinear refraction, a 0.2 mm diameter aperture was placed in front of the transmission detector and the transmittance

recorded as a function of the sample position on the Z-axis (closed-aperture Z-scan). To measure the nonlinear absorption, the Z-dependent sample transmittance was taken without the aperture (open-aperture Z-scan).

## Results and Discussion:

**Synthetic Strategy.** Although the heterobicluster-metal coordination polymer **1** is comprised of tetranuclear clusters ( $[\text{WS}_4\text{Cu}_3]^+$ ), pentanuclear clusters ( $[\text{WS}_4\text{Cu}_4]^{2+}$ ), and building metal ions ( $\text{Cu}^+$ ), interconnected by ditopic anionic bridges ( $\text{CN}^-$ ), an ammonium-crown ether host-guest supramolecular cation-templated assembly protocol has been demonstrated to be responsible for the construction of the heterobicluster-metal CP. The valence state and configuration (including size, geometry and structural rigidity) of cations have been shown to affect the formation of anionic skeletons of Mo(W)/S/Ag polymeric clusters.<sup>S7</sup> In our previous work, the univalent quaternary ammonium cation  $[\text{Et}_4\text{N}]^+$  with a mean radius of 3.34 Å (Table S2) induced the formation of a 3-D anionic cyanide-bridged W/S/Cu cluster-based CP  $\{[\text{Et}_4\text{N}]_2[\text{WS}_4\text{Cu}_4(\text{CN})_4]\}_n$  (C-CP **2**) fabricated from pentanuclear  $[\text{WS}_4\text{Cu}_4]^{2+}$  building clusters.<sup>S8</sup> When  $[\text{Et}_4\text{N}]^+$  was replaced by  $[n\text{-Bu}_4\text{N}]^+$ , with a larger mean radius of 5.86 Å (Table S2), another 3-D anionic cyanide-bridged W/S/Cu cluster-based CP  $\{[n\text{-Bu}_4\text{N}][\text{WS}_4\text{Cu}_3(\text{CN})_2]\}_n$  (C-CP **3**) composed of tetranuclear  $[\text{WS}_4\text{Cu}_3]^+$  building clusters was constructed.<sup>S9</sup> Compared with quaternary ammonium cations  $[\text{Et}_4\text{N}]^+$  and  $[n\text{-Bu}_4\text{N}]^+$ , the host-guest supramolecular cation  $[(\text{NH}_4)\subset(18\text{-crown-6})]^+$  exhibits a distinct geometry and structural rigidity (Figure S3). The mean radius of  $[(\text{NH}_4)\subset(18\text{-crown-6})]^+$  (4.62 Å, Table S2) is very close to the average value (4.60 Å) of the radii of  $[\text{Et}_4\text{N}]^+$  from **2** and  $[n\text{-Bu}_4\text{N}]^+$  from **3**. The distinct radius afforded by supramolecular encapsulation of the ammonium ion may be a key reason that the supramolecular cation  $[(\text{NH}_4)\subset(18\text{-crown-6})]^+$  directs the formation of the novel 3-D anionic cyanide-bridged W/S/Cu cluster-based CP comprised of both pentanuclear  $[\text{WS}_4\text{Cu}_4]^{2+}$  and tetranuclear  $[\text{WS}_4\text{Cu}_3]^+$  building clusters. Judicious choice of supramolecular encapsulation may thereby offer a continuum of ammonium ion radii, and thereby greatly expand the palette of cations/radii for templating coordination polymer assembly.

**TGA and PXRD Analyses.** TGA measurements reveal that the anionic framework of **1** is stable to 540 °C, beyond which it begins to slowly decompose (Figure S4). The peak positions of the experimental and simulated PXRD patterns are in good agreement (Figure S5), which indicates that the crystal structure of **1** is truly representative of the bulk crystal product.

**Initial Structure-Property Correlations.** We note that C-CPs **2** and **3** were constructed from single building clusters; interactions therefore only exist between the same clusters. In contrast, HCM-CP **1** was constructed from tetranuclear  $[\text{WS}_4\text{Cu}_3]^+$  and pentanuclear  $[\text{WS}_4\text{Cu}_4]^{2+}$  building clusters, with consequent interactions between different clusters (tetranuclear cluster  $[\text{WS}_4\text{Cu}_3]^+$  and pentanuclear cluster  $[\text{WS}_4\text{Cu}_4]^{2+}$ ). Our TD-DFT calculations confirm that electron transitions occur between the tetranuclear clusters  $[\text{WS}_4\text{Cu}_3]^+$  and the pentanuclear clusters  $[\text{WS}_4\text{Cu}_4]^{2+}$  (Figure S6b), and we suggest that these intercluster transitions may be a key ingredient in its enhanced optical properties.

## References:

- S1. J. W. McDonald, G. D. Frieson, L. D. Rosenhein and W. E. Newton, *Inorg. Chim. Acta*, 1983, **72**, 205-210.
- S2. G. M. Sheldrick, *SHELXS-97 and SHELXL-97, Programs for Crystal Structure Refinement*, University of Göttingen, Germany, 1997.
- S3. M. J. Frisch, G. W. Trucks, H. B. Schlegel, G. E. Scuseria, M. A. Robb, J. R. Cheeseman, J. A. Montgomery Jr., T. Vreven, K. N. Kudin, J. C. Burant, J. M. Millam, S. S. Iyengar, J. Tomasi, V. Barone, B. Mennucci, M. Cossi, G. Scalmani, N. Rega, G. A. Petersson, H. Nakatsuji, M. Hada, M. Ehara, K. Toyota, R. Fukuda, J. Hasegawa, M. Ishida, T. Nakajima, Y. Honda, O. Kitao, H. Nakai, M. Klene, X. Li, J. E. Knox, H. P. Hratchian, J. B. Cross, V. Bakken, C. Adamo, J. Jaramillo, R. Gomperts, R. E. Stratmann, O. Yazyev, A. J. Austin, R. Cammi, C. Pomelli, J. W. Ochterski, P. Y. Ayala, K. Morokuma, G. A. Voth, P. Salvador, J. J. Dannenberg, V. G. Zakrzewski, S. Dapprich, A. D. Daniels, M. C. Strain, O. Farkas, D. K. Malick, A. D. Rabuck, K. Raghavachari, J. B. Foresman, J. V. Ortiz, Q. Cui, A. G. Baboul, S. Clifford, J. Cioslowski, B. B. Stefanov, G. Liu, A. Liashenko, P. Piskorz, I. Komaromi, R. L. Martin, D. J. Fox, T. Keith, M. A. Al-Laham, C. Y. Peng, A. Nanayakkara, M. Challacombe, P. M. W. Gill, B. Johnson, W. Chen, M.

- W. Wong, C. Gonzalez and J. A. Pople, Gaussian 03; Revision D. 01; Gaussian, Inc.: Wallingford, CT, 2004.
- S4. K. M. Doxsee, P. E. Francis Jr. and T. J. R. Weakley, *Tetrahedron*, 2000, **56**, 6683-6691.
- S5. M. Sheik-Bahae, A. A. Said, T. H. Wei, D. J. Hagan and E. W. Van Stryland, *IEEE J. Quantum Electron.*, 1990, **26**, 760-769.
- S6. M. Sheik-Bahae, D. C. Hutchings, D. J. Hagan and E. W. Van Stryland, *IEEE J. Quantum Electron.*, 1991, **27**, 1296-1309.
- S7. (a) H. Yu, W. J. Zhang, X. T. Wu, T. L. Sheng, Q. M. Wang and P. Lin, *Angew. Chem., Int. Ed. Engl.*, 1998, **37**, 2520-2521; (b) J. H. Li, J. F. Zhang, M. G. Humphrey and C. Zhang, *Eur. J. Inorg. Chem.*, 2013, 328-346.
- S8. C. Zhang, Y. L. Song, Y. Xu, H. K. Fun, G. Y. Fang, Y. X. Wang and X. Q. Xin, *J. Chem. Soc. Dalton Trans.*, 2000, 2823-2829.
- S9. J. F. Zhang, Y. L. Song, J. Y. Yang, M. G. Humphrey and C. Zhang, *Cryst. Growth Des.*, 2008, **8**, 387-390.

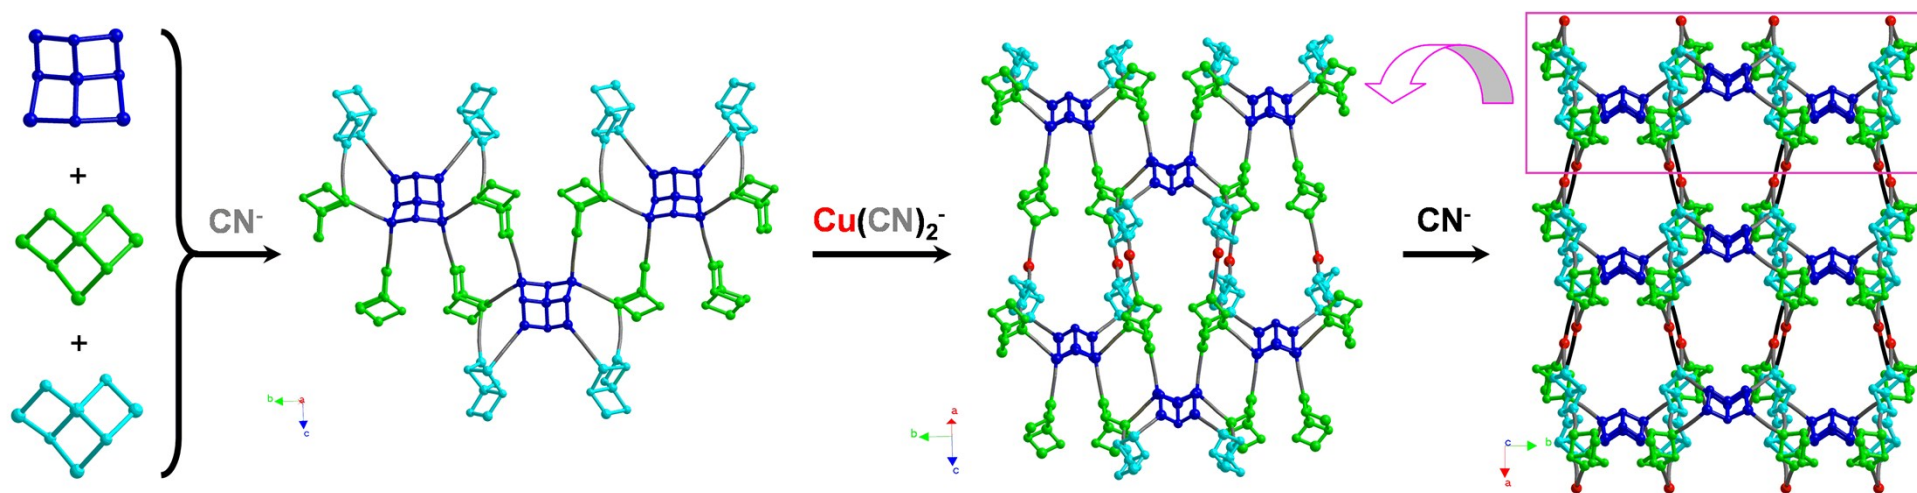

**Scheme S1.** Illustrative assembly of the anionic W/S/Cu-containing HCM-CP **1** (the W1-containing tetranuclear clusters, W2-containing tetranuclear clusters, pentanuclear clusters, and metal Cu ions are highlighted in green, cyanine, blue and red, respectively; the grey and black sticks represent the  $\text{CN}^-$  bridges).



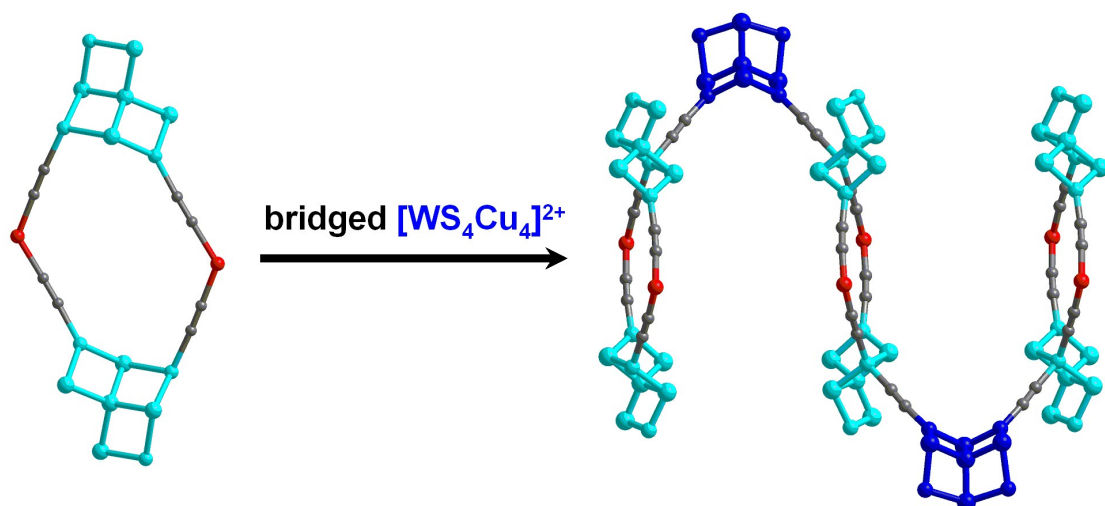

**Scheme S2.** Four-membered rings connected through bridged planar ‘open’  $[\text{WS}_4\text{Cu}_4]^{2+}$  clusters (the dimensions of the four-membered ring are  $6.591 \text{ \AA} \times 8.300 \text{ \AA}$ ).

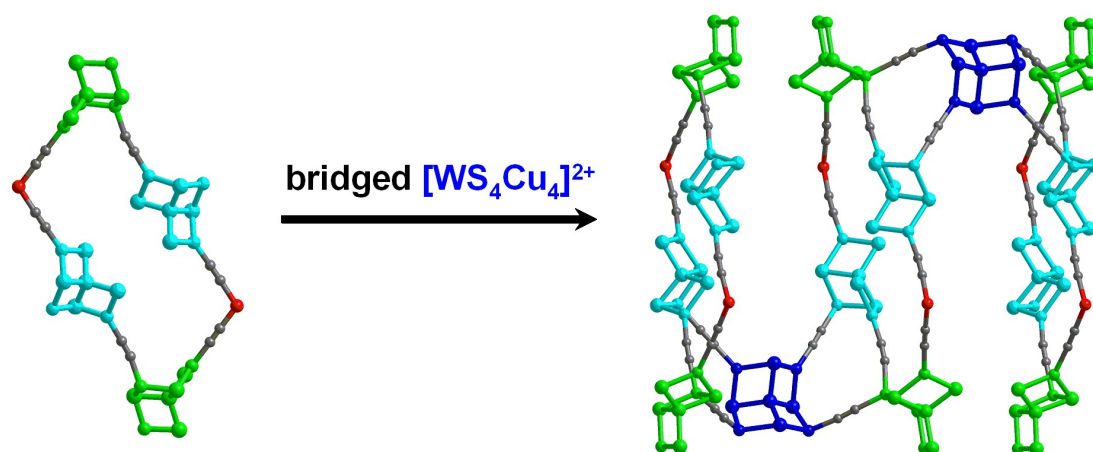

**Scheme S3.** Six-membered rings connected through bridged planar ‘open’  $[\text{WS}_4\text{Cu}_4]^{2+}$  clusters (the dimensions of the six-membered rings are  $7.057 \text{ \AA} \times 16.388 \text{ \AA}$ ).

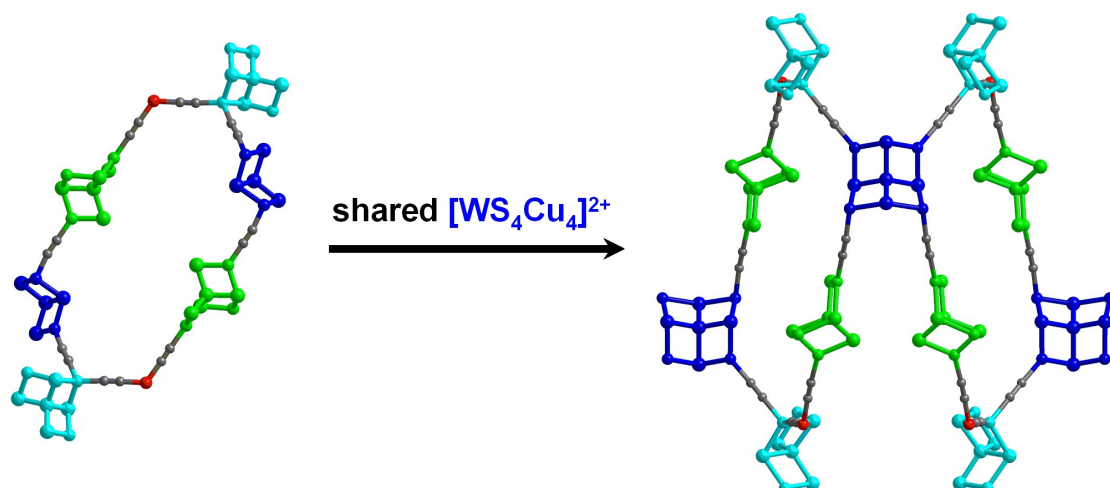

**Scheme S4.** Eight-membered rings connected through shared planar ‘open’  $[\text{WS}_4\text{Cu}_4]^{2+}$  clusters (the dimensions of the eight-membered rings are  $11.641 \text{ \AA} \times 20.193 \text{ \AA}$ ).

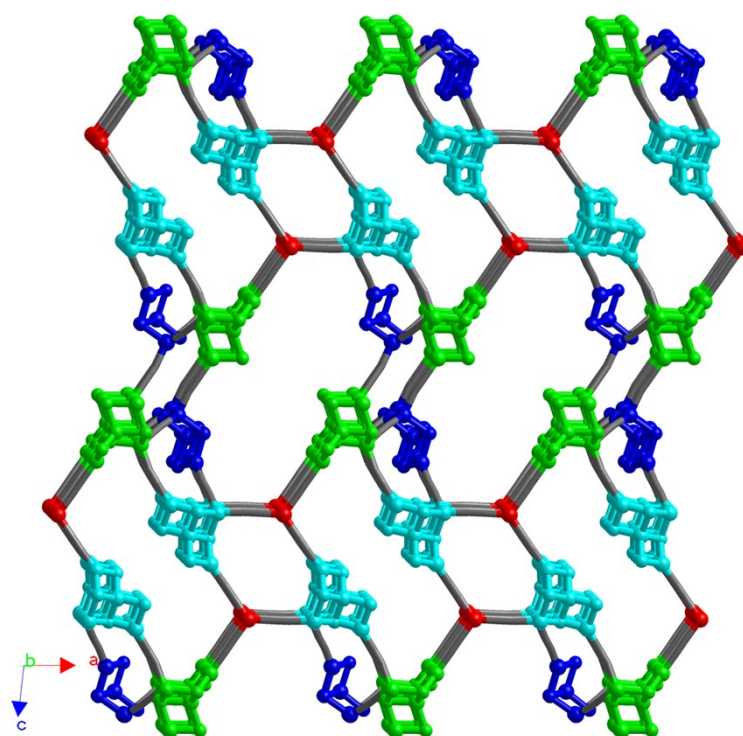

**Figure S1.** 3-D ball-and-stick packing diagram of the anionic HCM-CP **1** viewed approximately along the *b*-axis (the W1-containing tetranuclear clusters, W2-containing tetranuclear clusters, pentanuclear clusters, and metal Cu ions are highlighted in green, cyanine, blue, and red, respectively; the grey sticks represent the CN<sup>-</sup> bridges).

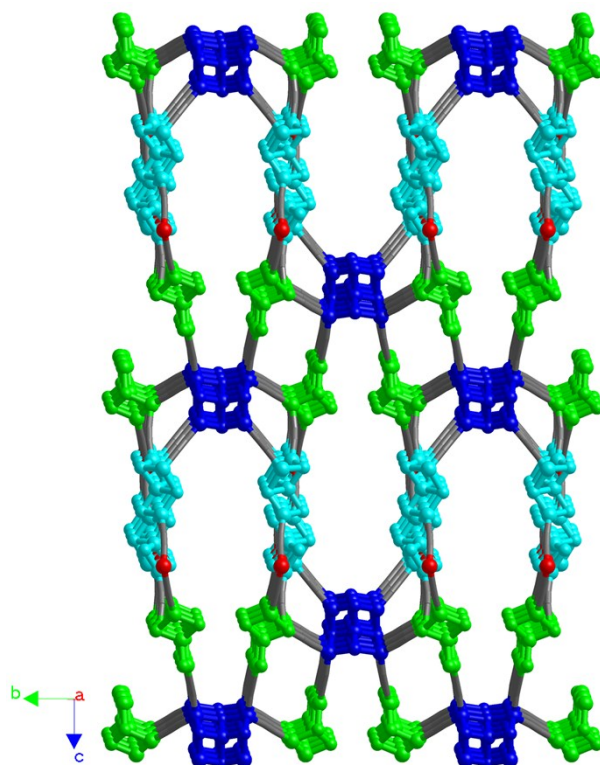

**Figure S2.** 3-D ball-and-stick packing diagram of the anionic HCM-CP **1** viewed approximately along the *a*-axis (the W1-containing tetranuclear clusters, W2-containing tetranuclear clusters, pentanuclear clusters, and metal Cu ions are highlighted in green, cyanine, blue, and red, respectively; the grey sticks represent the CN<sup>-</sup> bridges).

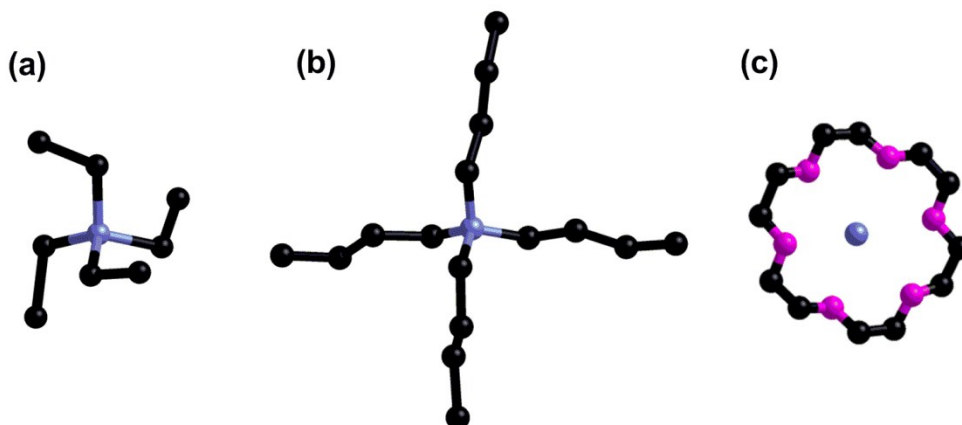

**Figure S3.** The configuration of the cation  $[\text{Et}_4\text{N}]^+$  (a) from  $\{[\text{Et}_4\text{N}]_2[\text{WS}_4\text{Cu}_4(\text{CN})_4]\}_n$  (C-CP **2**), the cation  $[\text{Bu}_4\text{N}]^+$  (b) from  $\{[\text{Bu}_4\text{N}][\text{WS}_4\text{Cu}_3(\text{CN})_2]\}_n$  (C-CP **3**), and the cation  $[(\text{NH}_4)\subset(18\text{-crown-6})]^+$  (c) from HCM-CP **1** (ball-and-stick representations, C black, O pink, N purple; all H atoms were omitted for clarity).

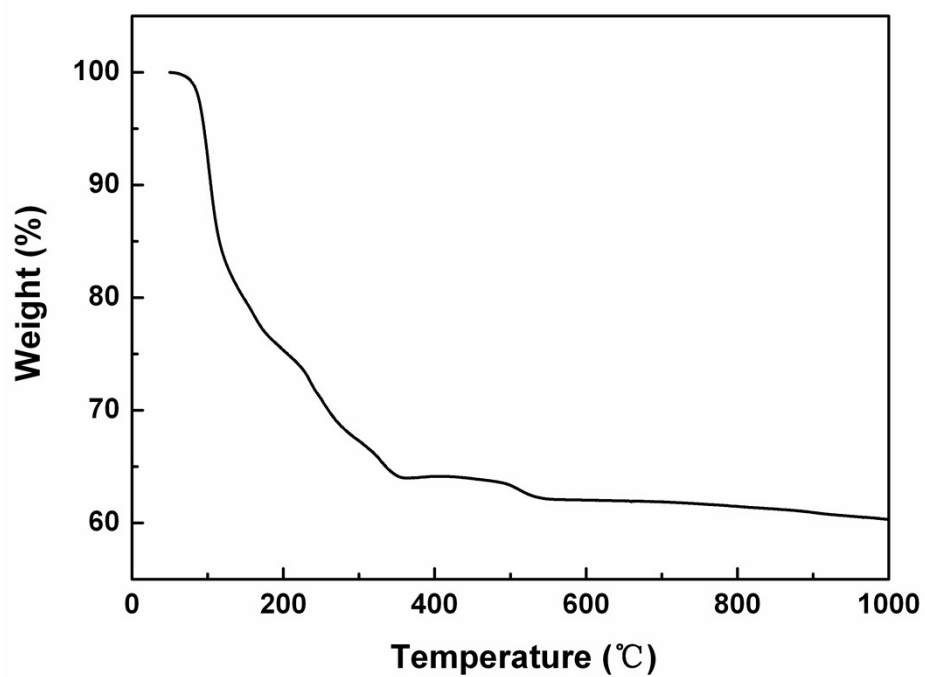

**Figure S4.** TGA curve for **1**.

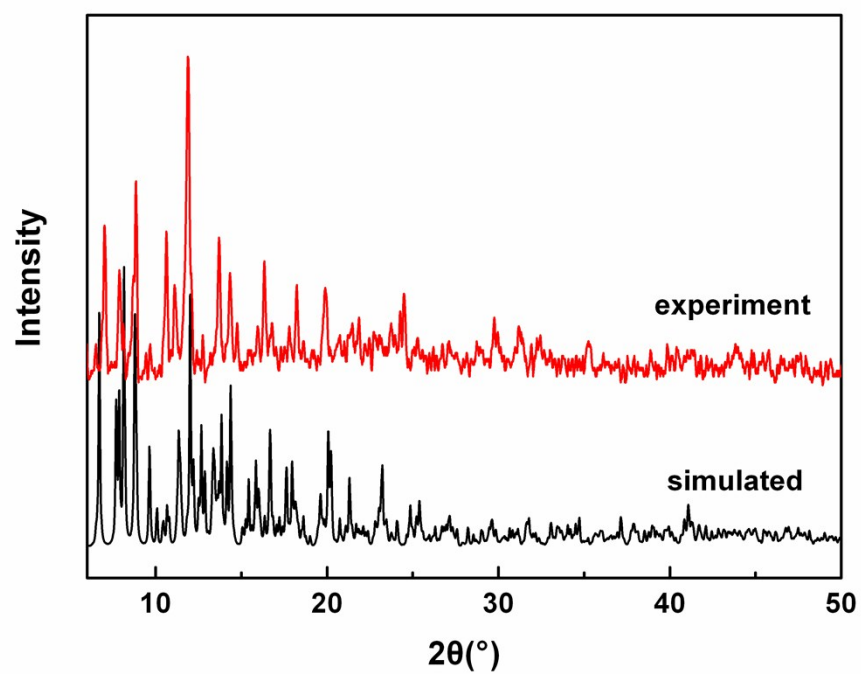

**Figure S5.** Comparison of the experimental and simulated PXRD patterns of **1**.



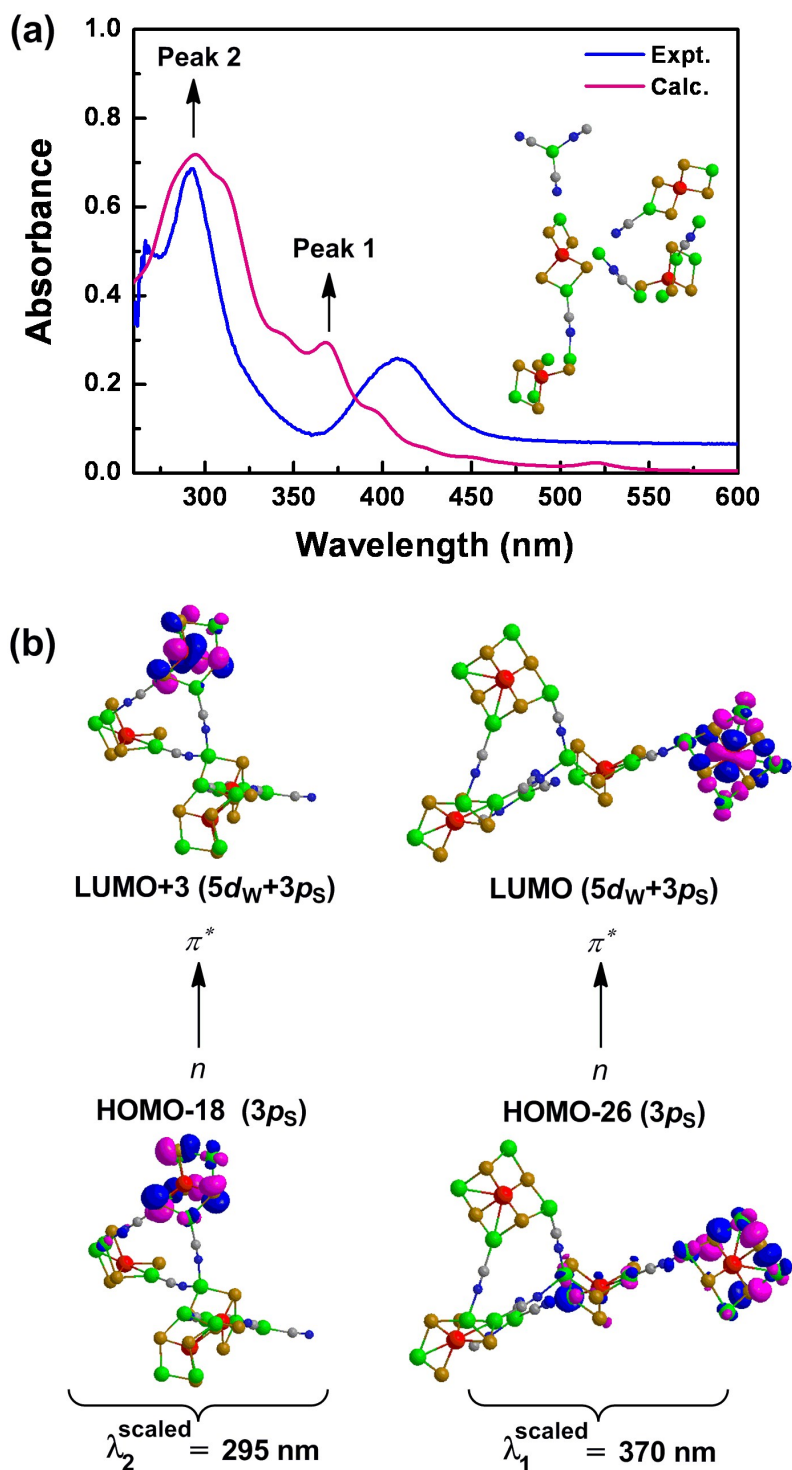

**Figure S6.** (a) Absorption spectra of **1** in DMF solution obtained from experimental observation (in blue line) and TD-DFT/PCM calculation (in red line). For the latter, a Lorentzian function has been employed with the spectral line width set to 60 nm. The theoretical spectrum is blue-shifted by 135 nm from that obtained from TD-DFT excitation energies. (b) Assignment of absorption peaks (Peak 1 and Peak 2) of **1** in DMF solution. The molecular orbitals are obtained through DFT/PCM calculations at the B3LYP/LanL2DZ level.

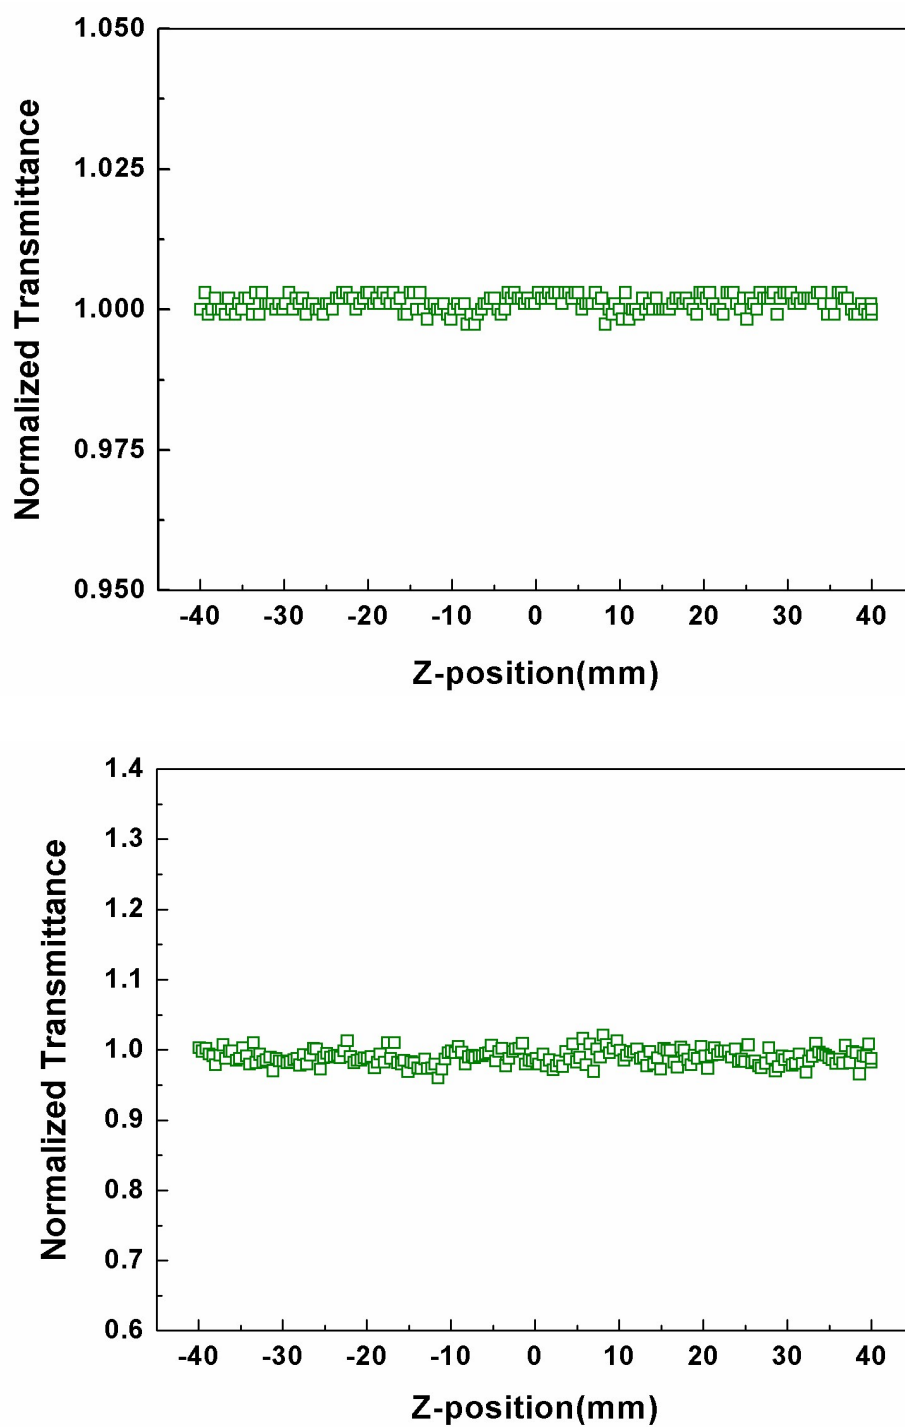

**Figure S7.** Normalized open-aperture (top) and closed-aperture (bottom) Z-scan curves showing negligible NLO absorption and refraction of aniline solvent, respectively, at 532 nm with 5 ns pulse durations.

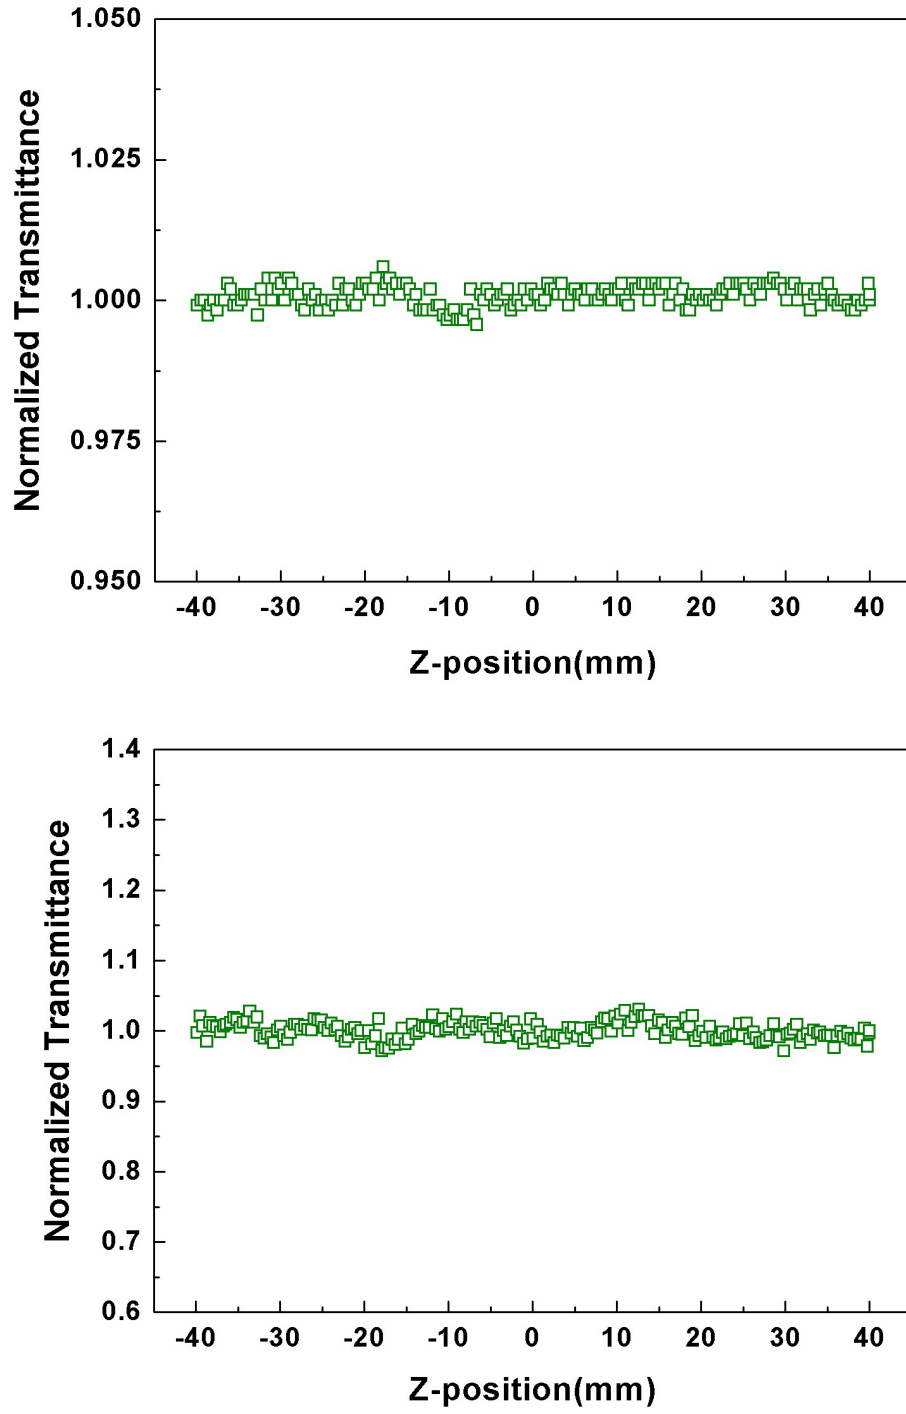

**Figure S8.** Normalized open-aperture (top) and closed-aperture (bottom) Z-scan curves showing negligible NLO absorption and refraction of 18-crown-6, respectively, at 532 nm with 5 ns pulse durations.

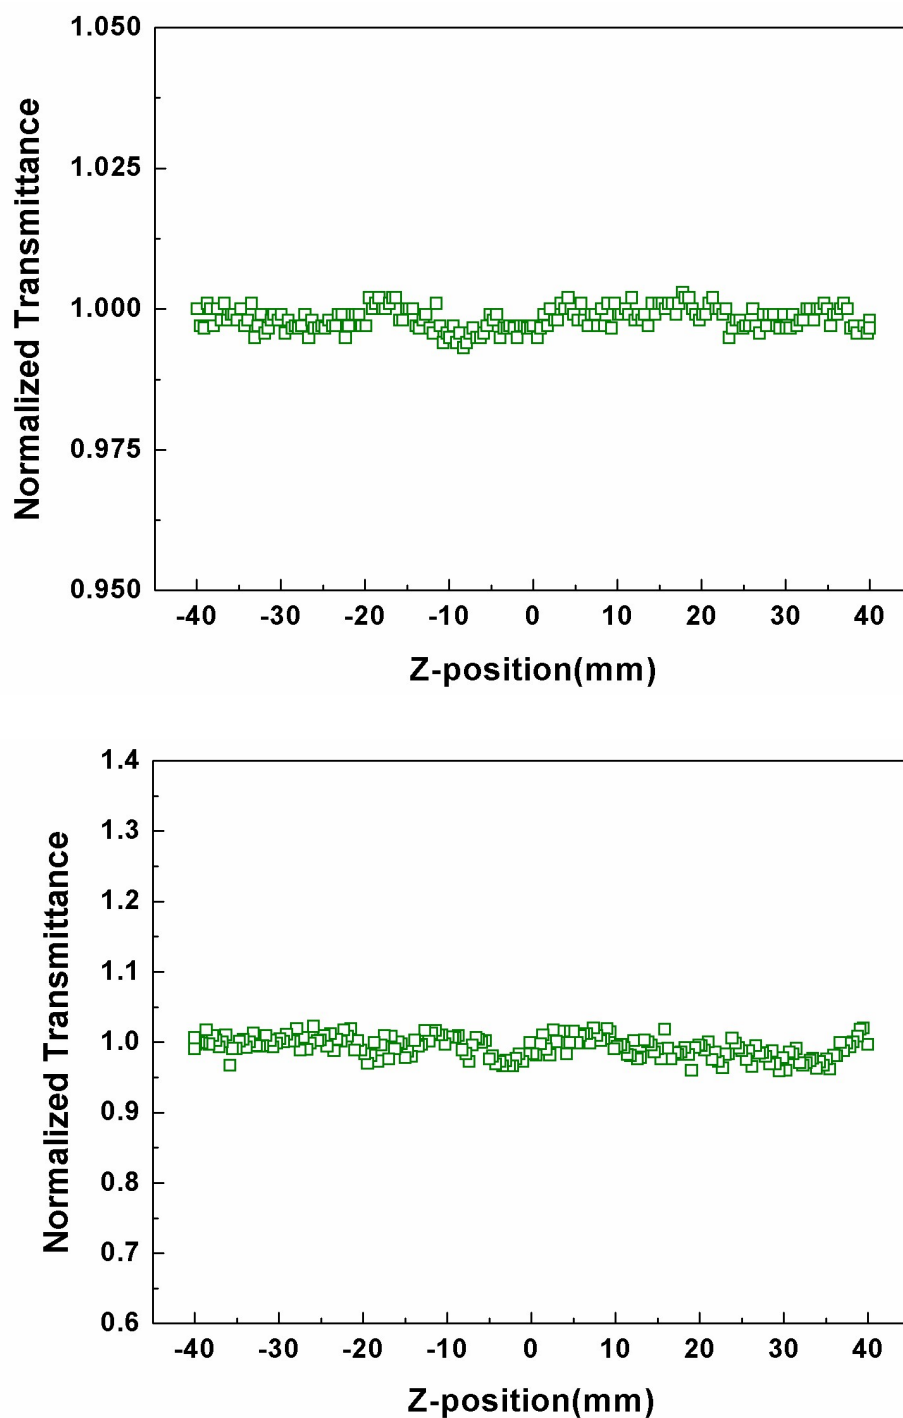

**Figure S9.** Normalized open-aperture (top) and closed-aperture (bottom) Z-scan curves showing negligible NLO absorption and refraction of  $[(\text{NH}_4)\text{C}(\text{18-crown-6})]\text{NO}_3$ , respectively, at 532 nm with 5 ns pulse durations.

**Table S1.** Crystallographic and structural refinement data for HCM-CP 1.

| HCM-CP 1                                                                 |                                                                                                                   |
|--------------------------------------------------------------------------|-------------------------------------------------------------------------------------------------------------------|
| Molecular formula                                                        | C <sub>111</sub> H <sub>220</sub> Cu <sub>18</sub> N <sub>30</sub> O <sub>42</sub> S <sub>20</sub> W <sub>5</sub> |
| Formula weight                                                           | 5351.67                                                                                                           |
| Temperature (K)                                                          | 150(2) K                                                                                                          |
| Wavelength (Å)                                                           | 0.71073                                                                                                           |
| Crystal system                                                           | monoclinic                                                                                                        |
| Space group                                                              | <i>P</i> 2 <sub>1</sub> /m                                                                                        |
| <i>a</i> (Å)                                                             | 16.682(3)                                                                                                         |
| <i>b</i> (Å)                                                             | 21.662(4)                                                                                                         |
| <i>c</i> (Å)                                                             | 27.674(5)                                                                                                         |
| $\alpha$ (°)                                                             | 90                                                                                                                |
| $\beta$ (°)                                                              | 96.49(3)                                                                                                          |
| $\gamma$ (°)                                                             | 90                                                                                                                |
| <i>V</i> (Å <sup>3</sup> )                                               | 9936(3)                                                                                                           |
| <i>Z</i>                                                                 | 2                                                                                                                 |
| $\rho_{\text{calc}}$ (g cm <sup>-3</sup> )                               | 1.789                                                                                                             |
| $\mu$ (mm <sup>-1</sup> )                                                | 5.037                                                                                                             |
| <i>F</i> (000)                                                           | 5286                                                                                                              |
| Reflections collected                                                    | 38779                                                                                                             |
| Unique reflections                                                       | 16529                                                                                                             |
| <i>R</i> <sub>int</sub>                                                  | 0.0390                                                                                                            |
| No. parameters                                                           | 919                                                                                                               |
| <i>GOF</i>                                                               | 0.998                                                                                                             |
| <i>R</i> <sub>1</sub> [ <i>I</i> > 2σ( <i>I</i> )]                       | 0.0690                                                                                                            |
| <i>wR</i> <sub>2</sub> [ <i>I</i> > 2σ( <i>I</i> )]                      | 0.1510                                                                                                            |
| $\Delta\rho_{\text{max}} / \Delta\rho_{\text{min}}$ (e Å <sup>-3</sup> ) | 1.538 / -1.892                                                                                                    |

**Table S2.** The mean radii of cations in some related W/S/Cu polymeric/discrete clusters and coordination polymers.

| Molecular Formula                                                                                                                                                                                                                                                                                     | Mean radius of cation <sup>a</sup> (Å) | Reference |
|-------------------------------------------------------------------------------------------------------------------------------------------------------------------------------------------------------------------------------------------------------------------------------------------------------|----------------------------------------|-----------|
| $\{[\text{Et}_4\text{N}]_2[\text{WS}_4\text{Cu}_4(\text{CN})_4]\}_n$                                                                                                                                                                                                                                  | 3.34                                   | [SS1]     |
| $\{[\text{Et}_4\text{N}]_2[\text{WS}_4(\text{CuNCSe})_4]\}_n$                                                                                                                                                                                                                                         | 3.38                                   | [SS2]     |
| $\{[\text{Et}_4\text{N}][\text{WOS}_3\text{Cu}_3\{\text{S}_2\text{P}(\text{OMe})_2\}_2]\}_n$                                                                                                                                                                                                          | 3.36                                   | [SS3]     |
| $[\text{Et}_4\text{N}]_2[\text{WS}_4\text{Cu}_4(\text{SCN})_4(2\text{-pic})_4]$                                                                                                                                                                                                                       | 3.35                                   | [SS4]     |
| $\{[\text{Et}_4\text{N}][\text{Fe}(5\text{-CIL1})_2[\text{Fe}(\text{CN})_6]]_n$                                                                                                                                                                                                                       | 3.34                                   | [SS5]     |
| $\{[\text{Et}_4\text{N}][\text{Cu}_2(\text{CN})_3]\}_n$                                                                                                                                                                                                                                               | 3.38                                   | [SS6]     |
| $\{[n\text{-Bu}_4\text{N}][\text{WS}_4\text{Cu}_3(\text{CN})_2]\}_n$                                                                                                                                                                                                                                  | 5.86                                   | [SS7]     |
| $\{[n\text{-Bu}_4\text{N}]_2[\text{W}_2\text{O}_2\text{S}_6\text{Cu}_6\text{Br}_4(4,4'\text{-bipy})_3]\}_n$                                                                                                                                                                                           | 5.84                                   | [SS8]     |
| $[n\text{-Bu}_4\text{N}]_4[\text{W}_4\text{Cu}_{10}\text{S}_{16.5}\text{O}_{2.5}] \cdot \text{H}_2\text{O}$                                                                                                                                                                                           | 5.66                                   | [SS9]     |
| $[n\text{-Bu}_4\text{N}][\text{WS}_4\text{Cu}_3\text{Br}_2(\text{dppm})_2]$                                                                                                                                                                                                                           | 5.62                                   | [SS10]    |
| $\{[n\text{-Bu}_4\text{N}][\text{Cu}(\text{CN})\text{Br}]\}_n$                                                                                                                                                                                                                                        | 5.72                                   | [SS11]    |
| $\{[n\text{-Bu}_4\text{N}][\text{Cu}_3(\text{CN})_4] \cdot \text{CH}_3\text{CN}\}_n$                                                                                                                                                                                                                  | 5.87                                   | [SS11]    |
| $\{[n\text{-Bu}_4\text{N}]_2[\text{Eu}(\text{NO}_3)_4\text{Au}(\text{CN})_2]\}_n$                                                                                                                                                                                                                     | 5.79                                   | [SS12]    |
| $^3_\infty\{ \{[(\text{NH}_4)\subset(18\text{-crown-6})]_6 \cdot 5\text{DMF} \cdot 5\text{CH}_3\text{CN} \cdot \text{H}_2\text{O}\} \subset \{[\text{WS}_4\text{Cu}_3(\text{CN})_2]_2[\text{WS}_4\text{Cu}_3(\text{CN})_2]_2[\text{WS}_4\text{Cu}_4(\text{CN})_3][\text{Cu}(\text{CN})_{1.5}]_2\} \}$ | 4.62                                   | This work |

<sup>a</sup> The mean radius of  $[\text{Et}_4\text{N}]^+$  or  $[n\text{-Bu}_4\text{N}]^+$  is defined as the average value of the longest distances between the central N and each H atom on every methyl; the mean radius of  $[(\text{NH}_4)\subset(18\text{-crown-6})]^+$  is defined as the average value of the longest distances between the central N and each H atom on every methylene. All mean radii are calculated according to their CIFs from the CCDC.

<sup>b</sup> Abbreviation: dppm = bis(diphenylphosphino)methane; 4,4'-bipy = 4,4'-bipyridine; 5-CIL1H2 = N,N'-bis(5-chlorosalicylidenato)-2,2-dimethyl-1,3-diaminopropane.

**Table S3.** Nonlinear optical parameters (second hyperpolarizabilities) of some related Mo(W)/S/Cu polymeric/discrete heterothiometallic clusters and coordination polymers.

| Molecular Formula                                                                                                                                              | Skeleton Type                         | $\gamma$ (esu)            | $\lambda$ (nm) | Reference |
|----------------------------------------------------------------------------------------------------------------------------------------------------------------|---------------------------------------|---------------------------|----------------|-----------|
| [MoS <sub>4</sub> Cu <sub>4</sub> I <sub>2</sub> (py) <sub>6</sub> ]                                                                                           | Planar-Open Cluster                   | $5.8 \times 10^{-30}$     | 532            | [SS13]    |
| [WS <sub>4</sub> Cu <sub>4</sub> I <sub>2</sub> (py) <sub>6</sub> ]                                                                                            | Planar-Open Cluster                   | $6.9 \times 10^{-30}$     | 532            | [SS13]    |
| [MoS <sub>4</sub> Cu <sub>4</sub> Br <sub>2</sub> (py) <sub>6</sub> ]                                                                                          | Planar-Open Cluster                   | $1.2 \times 10^{-30}$     | 532            | [SS13]    |
| [WS <sub>4</sub> Cu <sub>4</sub> Br <sub>2</sub> (py) <sub>6</sub> ]                                                                                           | Planar-Open Cluster                   | $1.3 \times 10^{-30}$     | 532            | [SS13]    |
| [MoS <sub>4</sub> Cu <sub>4</sub> (SCN <sub>2</sub> )(py) <sub>6</sub> ]                                                                                       | Planar-Open Cluster                   | $7.0 \times 10^{-30}{}^b$ | 532            | [SS14]    |
| [WS <sub>4</sub> Cu <sub>4</sub> (SCN <sub>2</sub> )(py) <sub>6</sub> ]                                                                                        | Planar-Open Cluster                   | $7.4 \times 10^{-30}{}^b$ | 532            | [SS14]    |
| {[Et <sub>4</sub> N] <sub>2</sub> [MoS <sub>4</sub> Cu <sub>4</sub> (CN) <sub>4</sub> ]} <sub>n</sub>                                                          | 3D Planar-Open Polymeric Cluster      | $1.2 \times 10^{-29}$     | 532            | [SS1]     |
| {[Et <sub>4</sub> N] <sub>2</sub> [WS <sub>4</sub> Cu <sub>4</sub> (CN) <sub>4</sub> ]} <sub>n</sub>                                                           | 3D Planar-Open Polymeric Cluster      | $1.3 \times 10^{-29}$     | 532            | [SS1]     |
| {[WS <sub>4</sub> Cu <sub>4</sub> (bipy) <sub>4</sub> ][WS <sub>4</sub> Cu <sub>4</sub> I <sub>4</sub> (bipy) <sub>2</sub> ·4H <sub>2</sub> O]} <sub>n</sub>   | 3D Planar-Open Polymeric Cluster      | $4.4 \times 10^{-29}{}^b$ | 532            | [SS15]    |
| {[Bu <sub>4</sub> N][WS <sub>4</sub> Cu <sub>3</sub> (CN) <sub>2</sub> ]} <sub>n</sub>                                                                         | 3D T-Shaped Polymeric Cluster         | $3.4 \times 10^{-30}$     | 532            | [SS7]     |
| {[MoOS <sub>3</sub> Cu <sub>3</sub> (CN)(py) <sub>3</sub> ]·0.5C <sub>6</sub> H <sub>6</sub> } <sub>n</sub>                                                    | 1D Nest-Shaped Polymeric Cluster      | $1.9 \times 10^{-29}{}^b$ | 532            | [SS16]    |
| 3 <sub>∞</sub> {[(NO <sub>3</sub> )(NMe <sub>4</sub> ) <sub>3</sub> ]⊂[WOS <sub>3</sub> Cu <sub>3</sub> (CN) <sub>3</sub> ]}                                   | 3D Nest-Shaped Polymeric Cluster      | $3.3 \times 10^{-30}$     | 532            | [SS17]    |
| 3 <sub>∞</sub> {[(NH <sub>4</sub> )(DMF) <sub>2</sub> ]⊂[W <sub>2</sub> O <sub>2</sub> S <sub>6</sub> Cu <sub>6</sub> (CN) <sub>3</sub> (bipy) <sub>4</sub> ]} | 3D Nest-Shaped Polymeric Cluster      | $4.9 \times 10^{-29}$     | 532            | [SS17]    |
| 3 <sub>∞</sub> {[(NH <sub>4</sub> )(DMF) <sub>2</sub> ]⊂[W <sub>2</sub> O <sub>2</sub> S <sub>6</sub> Cu <sub>6</sub> (CN) <sub>3</sub> (bpee) <sub>4</sub> ]} | 3D Nest-Shaped Polymeric Cluster      | $3.6 \times 10^{-29}$     | 532            | [SS17]    |
| {[Tp*WS <sub>3</sub> Cu <sub>3</sub> (μ <sub>3</sub> -DMF){Cu(CN) <sub>3</sub> }] <sub>2</sub> ·2DMF·MeCN} <sub>n</sub>                                        | 2D Cubane-Like Polymeric Cluster      | $4.3 \times 10^{-31}$     | 800            | [SS18]    |
| {K[Tp*WS <sub>3</sub> Cu <sub>3</sub> (μ <sub>3</sub> -DMF){Cu <sub>2</sub> (CN) <sub>4.5</sub> }] <sub>2</sub> ·4DMF·2MeCN} <sub>n</sub>                      | 3D Cubane-Like Polymeric Cluster      | $4.4 \times 10^{-31}$     | 800            | [SS18]    |
| {[MoOS <sub>3</sub> Cu <sub>3</sub> (bibp) <sub>2.5</sub> ](I)} <sub>n</sub>                                                                                   | 2D Twin-Nest-Shaped Polymeric Cluster | $2.3 \times 10^{-29}{}^b$ | 532            | [SS19]    |
| {[WOS <sub>3</sub> Cu <sub>3</sub> Br(TIPA)]·H <sub>2</sub> O·DMF} <sub>n</sub>                                                                                | 3D Nest-Shaped Polymeric Cluster      | $1.9 \times 10^{-29}{}^b$ | 532            | [SS19]    |
| [Ag(1,3-μ <sub>2</sub> -SCN)(μ <sub>2</sub> -hmt)] <sub>n</sub>                                                                                                | 2D Coordination Polymer               | $2.3 \times 10^{-30}$     | 532            | [SS20]    |
| {[Ag(1,1,3-μ <sub>3</sub> -SCN)] <sub>2</sub> (μ <sub>2</sub> -hmt)} <sub>n</sub>                                                                              | 2D Coordination Polymer               | $6.9 \times 10^{-30}$     | 532            | [SS20]    |

|                                                                                                                                                                                                                                                                                                         |                                                                     |                           |     |           |
|---------------------------------------------------------------------------------------------------------------------------------------------------------------------------------------------------------------------------------------------------------------------------------------------------------|---------------------------------------------------------------------|---------------------------|-----|-----------|
| $[\text{Ag}(1,1,3\text{-}\mu_3\text{-SCN})(\mu_4\text{-hmt})_{0.5}]_n$                                                                                                                                                                                                                                  | 3D Coordination Polymer                                             | $1.1 \times 10^{-29}$     | 532 | [SS20]    |
| $\{\text{K} \cdot \text{Na} \cdot [\text{Ni}_2(\mu_6\text{-btc})(\mu_2\text{-ox})(\text{H}_2\text{O})_2] \cdot 2\text{H}_2\text{O}\}_n$                                                                                                                                                                 | 3D Coordination Polymer                                             | $5.0 \times 10^{-30}$     | 532 | [SS21]    |
| $\{\text{K} \cdot \text{Na} \cdot [\text{Co}_2(\mu_6\text{-btc})(\mu_2\text{-ox})(\text{H}_2\text{O})_2] \cdot 2\text{H}_2\text{O}\}_n$                                                                                                                                                                 | 3D Coordination Polymer                                             | $3.0 \times 10^{-30}$     | 532 | [SS21]    |
| $[\text{Fe}_2(\mu_{10}\text{-btc})_{0.5}(\mu_2\text{-ox})_{0.5}(\mu_2\text{-O})_{1.5}]_n$                                                                                                                                                                                                               | 3D Coordination Polymer                                             | $6.0 \times 10^{-30}$     | 532 | [SS22]    |
| $[\text{Co}(\text{bbbt})_2(\text{NCS})_2]_n$                                                                                                                                                                                                                                                            | 2D Coordination Polymer                                             | $2.4 \times 10^{-30}$     | 532 | [SS23]    |
| $[\text{Mn}(\text{bbbt})_2(\text{NCS})_2]_n$                                                                                                                                                                                                                                                            | 2D Coordination Polymer                                             | $1.5 \times 10^{-30}$     | 532 | [SS23]    |
| $[\text{Cd}(\text{bbbt})_2(\text{NCS})_2]_n$                                                                                                                                                                                                                                                            | 2D Coordination Polymer                                             | $1.5 \times 10^{-30}$     | 532 | [SS23]    |
| $[\text{Pb}(\text{bbbm})_2(\text{NO}_3)_2]_n$                                                                                                                                                                                                                                                           | 2D Coordination Polymer                                             | $2.3 \times 10^{-29}{}^b$ | 532 | [SS24]    |
| $[\text{Zn}(\text{bbbt})(\text{NCS})_2]_n$                                                                                                                                                                                                                                                              | 1D Coordination Polymer                                             | $1.5 \times 10^{-29}{}^b$ | 532 | [SS24]    |
| $[\text{Zn}(\text{pbbt})(\text{NCS})_2]_n$                                                                                                                                                                                                                                                              | 1D Coordination Polymer                                             | $1.2 \times 10^{-29}{}^b$ | 532 | [SS24]    |
| $\{[\text{Cd}(\text{fcz})_2\text{Cl}_2] \cdot \text{CH}_3\text{OH} \cdot 2\text{H}_2\text{O}\}_n$                                                                                                                                                                                                       | 2D Coordination Polymer                                             | $1.2 \times 10^{-30}$     | 532 | [SS25]    |
| $\{[\text{Co}(\text{fcz})_2\text{Cl}_2] \cdot 2\text{CH}_3\text{OH}\}_n$                                                                                                                                                                                                                                | 2D Coordination Polymer                                             | $1.5 \times 10^{-30}$     | 532 | [SS25]    |
| $[\text{AgCu}_2(\text{C}_7\text{H}_2\text{NO}_5)(\text{C}_7\text{H}_3\text{NO}_5)]_n \cdot 2n\text{H}_2\text{O}$                                                                                                                                                                                        | 2D Coordination Polymer                                             | $1.3 \times 10^{-29}{}^b$ | 532 | [SS26]    |
| $[\text{Cu}_3(\text{C}_7\text{H}_2\text{NO}_5)_2]_n \cdot 3n\text{H}_2\text{O}$                                                                                                                                                                                                                         | 3D Coordination Polymer                                             | $2.2 \times 10^{-30}{}^b$ | 532 | [SS27]    |
| $[\text{CuAg}_2(\text{C}_7\text{H}_3\text{NO}_5)_2]_n$                                                                                                                                                                                                                                                  | 2D Coordination Polymer                                             | $2.5 \times 10^{-30}{}^b$ | 532 | [SS27]    |
| ${}^3_{\infty}\{[(\text{NH}_4)\subset(18\text{-crown-6})]_6 \cdot 5\text{DMF} \cdot 5\text{CH}_3\text{CN} \cdot \text{H}_2\text{O}\}$<br>$\subset\{[\text{WS}_4\text{Cu}_3(\text{CN})_2]_2[\text{WS}_4\text{Cu}_3(\text{CN})_2]_2[\text{WS}_4\text{Cu}_4(\text{CN})_3][\text{Cu}(\text{CN})_{1.5}]_2\}$ | 3D Planar-Open Cluster/T-Shaped Cluster/<br>Metal Polymeric Cluster | $7.3 \times 10^{-29}$     | 532 | This work |

<sup>a</sup> Abbreviation: py = pyridine, bipy = 4,4'-bipyridine, bpee = 1,2-(*E*)-bis(4-pyridyl)ethene, bibp = 4,4'-di(1*H*-imidazol-1-yl)-1,1'-biphenyl, tipa = tris(4-(1*H*-imidazol-1-yl)phenyl)amine, hmt = hexamethylenetetramine, bbbt = 1,1'-(1,4-butanediyl)bis-1*H*-benzotriazole,  $\text{C}_7\text{H}_5\text{NO}_5$  = 2,6-dicarboxy-4-hydroxypyridine, bbbm = 1,1'-(1,4-butanediyl)bis-1*H*-benzimidazole, pbbt = 1,1'-(1,3-propylene)bis-1*H*-benzotriazole, fcz =  $\alpha$ -(2,4-difluorophenyl)- $\alpha$ -(1*H*-1,2,4-triazol-1-ylmethyl)-1*H*-1,2,4-triazole-1-ethanol, btc = 1,2,4,5-benzenetetracarboxylate, ox = oxalate.

<sup>b</sup> The hyperpolarizabilities  $\gamma$  are calculated based on nonlinear absorptive coefficients  $a_2$  and nonlinear refractive indexes  $n_2$  from the references.



### References for Tables S2 and S3:

- SS1. C. Zhang, Y. L. Song, Y. Xu, H. K. Fun, G. Y. Fang, Y. X. Wang and X. Q. Xin, *J. Chem. Soc. Dalton Trans.*, 2000, 2823-2829.
- SS2. A. Beheshti, W. Clegg and H. Fallah, *Inorg. Chim. Acta*, 2001, **322**, 1-6.
- SS3. Z. H. Li, S. W. Du and X. T. Wu, *Inorg. Chem. Commun.*, 2006, **9**, 79-81.
- SS4. C. Zhang, Y. L. Song, G. C. Jin, G. Y. Fang, Y. X. Wang, S. S. S. Raj, H. K. Fun and X. Q. Xin, *J. Chem. Soc., Dalton Trans.*, 2000, 1317-1323.
- SS5. E. Gungor, Y. Yahsi, H. Kara and A. Caneschi, *CrystEngComm*, 2015, **17**, 3082-3088.
- SS6. E. Colacio, R. Kivekäs, F. Lloret, M. Sunberg, J. Suarez-Varela, M. Bardají and A. Laguna, *Inorg. Chem.*, 2002, **41**, 5141-5149.
- SS7. J. F. Zhang, Y. L. Song, J. Y. Yang, M. G. Humphrey and C. Zhang, *Cryst. Growth Des.*, 2008, **8**, 387-390.
- SS8. K. Liang, H. G. Zheng, Y. L. Song, Y. Z. Li, and X. Q. Xin, *Cryst. Growth Des.*, 2007, **7**, 373-376.
- SS9. J. Guo, X. T. Wu, W. J. Zhang, T. L. Sheng, Q. Huang, P. Lin, Q. M. Wang and J. X. Lu, *Angew. Chem., Int. Ed. Engl.*, 1997, **36**, 2464-2466.
- SS10. J. P. Lang and K. Tatsumi, *Inorg. Chem.*, 1998, **37**, 6308-6316.
- SS11. G. A. Bowmaker, H. Hartl and V. Urban, *Inorg. Chem.*, 2000, **39**, 4548-4554.
- SS12. R. J. Roberts, X. B. Li, T. F. Lacey, Z. Pan, H. H. Patterson and D. B. Leznoff, *Dalton Trans.*, 2012, **41**, 6992-6997.
- SS13. C. Zhang, Y. L. Song, F. E. Kühn, Y. X. Wang, H. K. Fun and X. Q. Xin, *J. Mater. Chem.*, 2002, **12**, 239-248.
- SS14. H. G. Zheng, W. L. Tan, W. Ji, W. H. Leung, I. D. Williams, D. L. Long, J. S. Huang and X. Q. Xin, *Inorg. Chim. Acta*, 1999, **294**, 73-78.
- SS15. K. Liang, H. G. Zheng, Y. L. Song, M. F. Lappert, Y. Z. Li, X. Q. Xin, Z. X. Huang, J. T. Chen and S. F. Lu, *Angew. Chem. Int. Ed.*, 2004, **43**, 5776-5779.
- SS16. H. W. Hou, H. G. Zheng, H. G. Ang, Y. T. Fan, M. K. M. Low, Y. Zhu, W. L. Wang, X. Q. Xin, W. Ji and W. T. Wong, *J. Chem. Soc. Dalton Trans.*, 1999, 2953-2957.
- SS17. C. Zhang, Y. Cao, J. F. Zhang, S. C. Meng, T. Matsumoto, Y. L. Song, J. Ma, Z. X. Chen, K. Tatsumi and M. G. Humphrey, *Adv. Mater.*, 2008, **20**, 1870-1875.
- SS18. X. Chen, H. X. Li, Z. Y. Zhang, W. Zhao, J. P. Lang and B. F. Abrahams, *Chem. Commun.*, 2012, **48**, 4480-4482.

- SS19. X. Q. Yao, Z. R. Pan, J. S. Hu, Y. Z. Li, Z. J. Guo and H. G. Zheng, *Chem. Commun.*, 2011, **47**, 10049-10051.
- SS20. J. H. Li, S. C. Meng, J. F. Zhang, Y. L. Song, Z. P. Huang, H. J. Zhao, H. Y. Wei, W. J. Huang, M. P. Cifuentes, M. G. Humphrey and C. Zhang, *CrystEngComm*, 2012, **14**, 2787-2796.
- SS21. L. J. Zhang, J. H. Yu, J. Q. Xu, J. Lu, H. Y. Bie and X. Zhang, *Inorg. Chem. Commun.*, 2005, **8**, 638-642.
- SS22. Y. Li, Z. X. Zhang, P. Z. Hong, Z. X. Wu and K. C. Li, *Inorg. Chem. Commun.*, 2008, **11**, 761-764.
- SS23. H. W. Hou, X. R. Meng, Y. L. Song, Y. T. Fan, Y. Zhu, H. J. Lu, C. X. Du and W. H. Shao, *Inorg. Chem.*, 2002, **41**, 4068-4075.
- SS24. X. R. Meng, Y. L. Song, H. W. Hou, Y. T. Fan, G. Li and Y. Zhu, *Inorg. Chem.*, 2003, **42**, 1306-1315.
- SS25. H. Y. Han, Y. L. Song, H. W. Hou, Y. T. Fan and Y. Zhu, *Dalton Trans.*, 2006, 1972-1980.
- SS26. J. P. Zou, G. W. Zhou, X. Zhang, M. S. Wang, Y. B. Lu, W. W. Zhou, Z. J. Zhang, G. C. Guo and J. S. Huang, *CrystEngComm*, 2009, **11**, 972-974.
- SS27. J. P. Zou, Q. Peng, Z. H. Wen, G. S. Zeng, Q. J. Xing and G. C. Guo, *Cryst. Growth Des.*, 2010, **10**, 2613-2619.

**Table S4. Results of Time-dependent Density Functional Theory (TD-DFT) Calculations**

**1-B3LYP-LanL2DZ TD-PCM (200 states) in DMF (dielectric constant = 36.7) solution**

**Excitation energies and oscillator strengths:**

Excited State 1: Singlet-A 0.6272 eV 1976.84 nm f = 0.0000  
264 ->265 0.70709

This state for optimization and/or second-order correction.

Total Energy, E(RPA) = -4026.36864041

Copying the excited state density for this state as the 1-particle RhoCI density.

Excited State 2: Singlet-A 0.9190 eV 1349.14 nm f = 0.0000  
264 ->266 0.70709

Excited State 3: Singlet-A 1.0488 eV 1182.11 nm f = 0.0000  
264 ->267 0.70709

Excited State 4: Singlet-A 1.0516 eV 1178.98 nm f = 0.0000  
263 ->265 0.70706

Excited State 5: Singlet-A 1.2662 eV 979.18 nm f = 0.0000  
264 ->268 0.70706

Excited State 6: Singlet-A 1.3434 eV 922.90 nm f = 0.0000  
263 ->266 0.70705

Excited State 7: Singlet-A 1.4668 eV 845.24 nm f = 0.0000  
261 ->265 0.17830  
262 ->265 0.68191

Excited State 8: Singlet-A 1.4738 eV 841.24 nm f = 0.0000  
263 ->267 0.70706

Excited State 9: Singlet-A 1.4947 eV 829.47 nm f = 0.0000  
259 ->265 0.10118  
261 ->265 0.67748  
262 ->265 -0.16915

Excited State 10: Singlet-A 1.6523 eV 750.36 nm f = 0.0001  
259 ->265 0.65127  
260 ->265 -0.22451

Excited State 11: Singlet-A 1.6912 eV 733.12 nm f = 0.0000  
263 ->268 0.70703

Excited State 12: Singlet-A 1.7574 eV 705.49 nm f = 0.0000  
261 ->266 0.17879  
262 ->266 0.68162

|                                                                       |                                                       |           |           |            |
|-----------------------------------------------------------------------|-------------------------------------------------------|-----------|-----------|------------|
| Excited State 13:<br>264 ->271                                        | Singlet-A<br>0.70679                                  | 1.7794 eV | 696.76 nm | f = 0.0000 |
| Excited State 14:<br>259 ->266<br>261 ->266<br>262 ->266              | Singlet-A<br>0.10285<br>0.67711<br>-0.16935           | 1.7855 eV | 694.40 nm | f = 0.0000 |
| Excited State 15:<br>264 ->269                                        | Singlet-A<br>0.70633                                  | 1.7954 eV | 690.55 nm | f = 0.0000 |
| Excited State 16:<br>259 ->265<br>260 ->265                           | Singlet-A<br>0.22891<br>0.66821                       | 1.7961 eV | 690.29 nm | f = 0.0000 |
| Excited State 17:<br>258 ->265                                        | Singlet-A<br>0.70447                                  | 1.8668 eV | 664.15 nm | f = 0.0000 |
| Excited State 18:<br>264 ->270                                        | Singlet-A<br>0.70694                                  | 1.8845 eV | 657.93 nm | f = 0.0000 |
| Excited State 19:<br>261 ->267<br>262 ->267                           | Singlet-A<br>0.55403<br>-0.42206                      | 1.8906 eV | 655.79 nm | f = 0.0022 |
| Excited State 20:<br>261 ->267<br>262 ->267                           | Singlet-A<br>0.43021<br>0.55567                       | 1.8975 eV | 653.42 nm | f = 0.0004 |
| Excited State 21:<br>264 ->272                                        | Singlet-A<br>0.70702                                  | 1.9004 eV | 652.42 nm | f = 0.0000 |
| Excited State 22:<br>259 ->266<br>260 ->266                           | Singlet-A<br>0.65090<br>-0.22431                      | 1.9425 eV | 638.27 nm | f = 0.0001 |
| Excited State 23:<br>254 ->265<br>255 ->265<br>256 ->265<br>257 ->265 | Singlet-A<br>0.15345<br>0.27015<br>0.16343<br>0.60501 | 1.9974 eV | 620.72 nm | f = 0.0003 |
| Excited State 24:<br>264 ->273<br>264 ->274                           | Singlet-A<br>0.67092<br>-0.22203                      | 2.0230 eV | 612.89 nm | f = 0.0000 |
| Excited State 25:<br>255 ->265<br>256 ->265<br>257 ->265              | Singlet-A<br>0.11490<br>0.65129<br>-0.24138           | 2.0282 eV | 611.30 nm | f = 0.0000 |
| Excited State 26:                                                     | Singlet-A                                             | 2.0514 eV | 604.38 nm | f = 0.0005 |

|                   |           |           |           |            |  |
|-------------------|-----------|-----------|-----------|------------|--|
| 253 ->265         | -0.10087  |           |           |            |  |
| 254 ->265         | 0.30110   |           |           |            |  |
| 255 ->265         | 0.51774   |           |           |            |  |
| 256 ->265         | -0.21958  |           |           |            |  |
| 257 ->265         | -0.25818  |           |           |            |  |
| Excited State 27: | Singlet-A | 2.0879 eV | 593.81 nm | f = 0.0000 |  |
| 259 ->266         | 0.22906   |           |           |            |  |
| 260 ->266         | 0.66893   |           |           |            |  |
| Excited State 28: | Singlet-A | 2.0955 eV | 591.66 nm | f = 0.0000 |  |
| 264 ->273         | 0.22201   |           |           |            |  |
| 264 ->274         | 0.67119   |           |           |            |  |
| Excited State 29: | Singlet-A | 2.1064 eV | 588.61 nm | f = 0.0005 |  |
| 261 ->268         | 0.56083   |           |           |            |  |
| 262 ->268         | -0.41360  |           |           |            |  |
| Excited State 30: | Singlet-A | 2.1144 eV | 586.37 nm | f = 0.0009 |  |
| 261 ->268         | 0.41863   |           |           |            |  |
| 262 ->268         | 0.55938   |           |           |            |  |
| Excited State 31: | Singlet-A | 2.1150 eV | 586.22 nm | f = 0.0002 |  |
| 252 ->265         | -0.22145  |           |           |            |  |
| 253 ->265         | 0.59249   |           |           |            |  |
| 254 ->265         | -0.16254  |           |           |            |  |
| 255 ->265         | 0.23660   |           |           |            |  |
| Excited State 32: | Singlet-A | 2.1309 eV | 581.85 nm | f = 0.0006 |  |
| 259 ->267         | 0.65569   |           |           |            |  |
| 260 ->267         | -0.23420  |           |           |            |  |
| Excited State 33: | Singlet-A | 2.1578 eV | 574.58 nm | f = 0.0000 |  |
| 253 ->265         | 0.25853   |           |           |            |  |
| 254 ->265         | 0.58716   |           |           |            |  |
| 255 ->265         | -0.29050  |           |           |            |  |
| Excited State 34: | Singlet-A | 2.1586 eV | 574.37 nm | f = 0.0000 |  |
| 258 ->266         | 0.70444   |           |           |            |  |
| Excited State 35: | Singlet-A | 2.1890 eV | 566.40 nm | f = 0.0000 |  |
| 264 ->275         | 0.70696   |           |           |            |  |
| Excited State 36: | Singlet-A | 2.2054 eV | 562.17 nm | f = 0.0000 |  |
| 263 ->271         | 0.70676   |           |           |            |  |
| Excited State 37: | Singlet-A | 2.2175 eV | 559.12 nm | f = 0.0000 |  |
| 259 ->267         | 0.23673   |           |           |            |  |
| 260 ->267         | 0.66621   |           |           |            |  |
| Excited State 38: | Singlet-A | 2.2175 eV | 559.11 nm | f = 0.0026 |  |
| 237 ->265         | 0.13652   |           |           |            |  |
| 243 ->265         | -0.26167  |           |           |            |  |

|                   |           |           |           |            |  |
|-------------------|-----------|-----------|-----------|------------|--|
| 244 ->265         | 0.57892   |           |           |            |  |
| 245 ->265         | -0.18060  |           |           |            |  |
| 253 ->265         | -0.10508  |           |           |            |  |
| Excited State 39: | Singlet-A | 2.2199 eV | 558.52 nm | f = 0.0000 |  |
| 263 ->269         | 0.70696   |           |           |            |  |
| Excited State 40: | Singlet-A | 2.2435 eV | 552.64 nm | f = 0.0000 |  |
| 264 ->276         | 0.70673   |           |           |            |  |
| Excited State 41: | Singlet-A | 2.2617 eV | 548.19 nm | f = 0.0000 |  |
| 252 ->265         | 0.66008   |           |           |            |  |
| 253 ->265         | 0.23558   |           |           |            |  |
| Excited State 42: | Singlet-A | 2.2881 eV | 541.86 nm | f = 0.0000 |  |
| 258 ->267         | 0.70262   |           |           |            |  |
| Excited State 43: | Singlet-A | 2.2888 eV | 541.70 nm | f = 0.0002 |  |
| 254 ->266         | 0.15562   |           |           |            |  |
| 255 ->266         | 0.27412   |           |           |            |  |
| 256 ->266         | 0.16369   |           |           |            |  |
| 257 ->266         | 0.60070   |           |           |            |  |
| Excited State 44: | Singlet-A | 2.3089 eV | 536.98 nm | f = 0.0000 |  |
| 263 ->270         | 0.70689   |           |           |            |  |
| Excited State 45: | Singlet-A | 2.3198 eV | 534.47 nm | f = 0.0000 |  |
| 255 ->266         | 0.11868   |           |           |            |  |
| 256 ->266         | 0.64388   |           |           |            |  |
| 257 ->266         | -0.24990  |           |           |            |  |
| Excited State 46: | Singlet-A | 2.3248 eV | 533.31 nm | f = 0.0000 |  |
| 263 ->272         | 0.70589   |           |           |            |  |
| Excited State 47: | Singlet-A | 2.3263 eV | 532.97 nm | f = 0.0073 |  |
| 240 ->265         | 0.40028   |           |           |            |  |
| 241 ->265         | -0.37331  |           |           |            |  |
| 248 ->267         | -0.15004  |           |           |            |  |
| 249 ->267         | 0.17893   |           |           |            |  |
| 254 ->267         | 0.11739   |           |           |            |  |
| 255 ->267         | 0.15386   |           |           |            |  |
| 256 ->267         | 0.16185   |           |           |            |  |
| Excited State 48: | Singlet-A | 2.3264 eV | 532.95 nm | f = 0.0014 |  |
| 240 ->265         | -0.25254  |           |           |            |  |
| 241 ->265         | 0.23607   |           |           |            |  |
| 248 ->267         | -0.23614  |           |           |            |  |
| 249 ->267         | 0.28180   |           |           |            |  |
| 251 ->267         | 0.12647   |           |           |            |  |
| 254 ->267         | 0.18509   |           |           |            |  |
| 255 ->267         | 0.24208   |           |           |            |  |
| 256 ->267         | 0.25436   |           |           |            |  |
| 257 ->267         | 0.12153   |           |           |            |  |

|                   |           |           |           |            |
|-------------------|-----------|-----------|-----------|------------|
| Excited State 49: | Singlet-A | 2.3435 eV | 529.07 nm | f = 0.0009 |
| 254 ->266         | 0.29684   |           |           |            |
| 255 ->266         | 0.51614   |           |           |            |
| 256 ->266         | -0.21473  |           |           |            |
| 257 ->266         | -0.25153  |           |           |            |
| Excited State 50: | Singlet-A | 2.3467 eV | 528.32 nm | f = 0.0002 |
| 256 ->267         | 0.31592   |           |           |            |
| 257 ->267         | -0.11105  |           |           |            |
| 259 ->268         | 0.56633   |           |           |            |
| 260 ->268         | -0.20212  |           |           |            |
| Excited State 51: | Singlet-A | 2.3485 eV | 527.94 nm | f = 0.0020 |
| 248 ->267         | 0.10073   |           |           |            |
| 249 ->267         | -0.11567  |           |           |            |
| 255 ->267         | -0.16673  |           |           |            |
| 256 ->267         | 0.50919   |           |           |            |
| 257 ->267         | -0.21761  |           |           |            |
| 259 ->268         | -0.32791  |           |           |            |
| 260 ->268         | 0.11730   |           |           |            |
| Excited State 52: | Singlet-A | 2.4067 eV | 515.17 nm | f = 0.0001 |
| 252 ->266         | -0.22491  |           |           |            |
| 253 ->266         | 0.60101   |           |           |            |
| 254 ->266         | -0.16635  |           |           |            |
| 255 ->266         | 0.22936   |           |           |            |
| Excited State 53: | Singlet-A | 2.4252 eV | 511.23 nm | f = 0.0029 |
| 246 ->267         | -0.28873  |           |           |            |
| 248 ->267         | 0.11870   |           |           |            |
| 253 ->267         | 0.33710   |           |           |            |
| 254 ->267         | 0.14745   |           |           |            |
| 255 ->267         | -0.16984  |           |           |            |
| 257 ->267         | 0.45657   |           |           |            |
| Excited State 54: | Singlet-A | 2.4345 eV | 509.27 nm | f = 0.0025 |
| 246 ->267         | 0.34421   |           |           |            |
| 247 ->267         | -0.12375  |           |           |            |
| 249 ->267         | -0.12840  |           |           |            |
| 252 ->267         | -0.21462  |           |           |            |
| 253 ->267         | 0.17809   |           |           |            |
| 254 ->267         | -0.32273  |           |           |            |
| 255 ->267         | 0.25700   |           |           |            |
| 256 ->267         | 0.18014   |           |           |            |
| 257 ->267         | 0.21326   |           |           |            |
| Excited State 55: | Singlet-A | 2.4349 eV | 509.21 nm | f = 0.0000 |
| 259 ->268         | 0.23656   |           |           |            |
| 260 ->268         | 0.66614   |           |           |            |
| Excited State 56: | Singlet-A | 2.4414 eV | 507.84 nm | f = 0.0009 |
| 256 ->271         | 0.66329   |           |           |            |

|                                                                                                                                        |                                                                                                                    |           |           |            |  |
|----------------------------------------------------------------------------------------------------------------------------------------|--------------------------------------------------------------------------------------------------------------------|-----------|-----------|------------|--|
| 257 ->271                                                                                                                              | -0.15568                                                                                                           |           |           |            |  |
| Excited State 57:<br>264 ->278                                                                                                         | Singlet-A<br>0.70377                                                                                               | 2.4474 eV | 506.61 nm | f = 0.0000 |  |
| Excited State 58:<br>246 ->267<br>247 ->267<br>249 ->267<br>252 ->267<br>253 ->267<br>257 ->267                                        | Singlet-A<br>-0.14323<br>-0.21541<br>0.14871<br>-0.14510<br>0.45677<br>-0.36161                                    | 2.4476 eV | 506.56 nm | f = 0.0047 |  |
| Excited State 59:<br>263 ->273<br>263 ->274                                                                                            | Singlet-A<br>0.67079<br>-0.22162                                                                                   | 2.4491 eV | 506.25 nm | f = 0.0000 |  |
| Excited State 60:<br>253 ->266<br>254 ->266<br>255 ->266                                                                               | Singlet-A<br>0.25511<br>0.58806<br>-0.29075                                                                        | 2.4494 eV | 506.18 nm | f = 0.0000 |  |
| Excited State 61:<br>237 ->265<br>238 ->265<br>240 ->265<br>242 ->265<br>243 ->265<br>245 ->265<br>248 ->265<br>249 ->265<br>251 ->265 | Singlet-A<br>-0.28835<br>0.44005<br>0.13743<br>-0.10838<br>0.12936<br>-0.20192<br>-0.20387<br>-0.13741<br>-0.10672 | 2.4571 eV | 504.59 nm | f = 0.0183 |  |
| Excited State 62:<br>264 ->277<br>264 ->279                                                                                            | Singlet-A<br>0.48167<br>0.51430                                                                                    | 2.4778 eV | 500.37 nm | f = 0.0053 |  |
| Excited State 63:<br>246 ->267<br>247 ->267<br>248 ->267<br>251 ->267<br>252 ->267<br>254 ->267<br>255 ->267                           | Singlet-A<br>-0.36317<br>0.20847<br>0.12110<br>-0.12623<br>0.12418<br>-0.22716<br>0.44188                          | 2.4821 eV | 499.52 nm | f = 0.0006 |  |
| Excited State 64:<br>258 ->268                                                                                                         | Singlet-A<br>0.70052                                                                                               | 2.5056 eV | 494.82 nm | f = 0.0000 |  |
| Excited State 65:<br>246 ->267<br>248 ->267<br>249 ->267                                                                               | Singlet-A<br>0.15627<br>0.13414<br>-0.16594                                                                        | 2.5122 eV | 493.54 nm | f = 0.0008 |  |



|                   |           |           |           |            |  |
|-------------------|-----------|-----------|-----------|------------|--|
| 253 ->267         | 0.14354   |           |           |            |  |
| 254 ->267         | 0.42455   |           |           |            |  |
| 255 ->267         | 0.20227   |           |           |            |  |
| 257 ->267         | -0.13781  |           |           |            |  |
| 264 ->277         | 0.25991   |           |           |            |  |
| 264 ->279         | -0.24071  |           |           |            |  |
| Excited State 66: | Singlet-A | 2.5123 eV | 493.51 nm | f = 0.0030 |  |
| 254 ->267         | -0.24723  |           |           |            |  |
| 255 ->267         | -0.11894  |           |           |            |  |
| 264 ->277         | 0.44593   |           |           |            |  |
| 264 ->279         | -0.41751  |           |           |            |  |
| Excited State 67: | Singlet-A | 2.5205 eV | 491.90 nm | f = 0.0000 |  |
| 263 ->273         | 0.22159   |           |           |            |  |
| 263 ->274         | 0.67102   |           |           |            |  |
| Excited State 68: | Singlet-A | 2.5525 eV | 485.73 nm | f = 0.0002 |  |
| 252 ->266         | 0.64995   |           |           |            |  |
| 253 ->266         | 0.24770   |           |           |            |  |
| Excited State 69: | Singlet-A | 2.5565 eV | 484.98 nm | f = 0.0057 |  |
| 246 ->267         | 0.19534   |           |           |            |  |
| 247 ->267         | 0.39469   |           |           |            |  |
| 248 ->267         | -0.10805  |           |           |            |  |
| 249 ->267         | 0.12454   |           |           |            |  |
| 249 ->268         | -0.10624  |           |           |            |  |
| 252 ->267         | 0.21902   |           |           |            |  |
| 253 ->267         | 0.30200   |           |           |            |  |
| 254 ->267         | -0.12189  |           |           |            |  |
| 255 ->267         | -0.14954  |           |           |            |  |
| 255 ->268         | -0.12819  |           |           |            |  |
| 256 ->268         | -0.11034  |           |           |            |  |
| Excited State 70: | Singlet-A | 2.5673 eV | 482.94 nm | f = 0.0011 |  |
| 256 ->268         | 0.67218   |           |           |            |  |
| 257 ->268         | -0.15714  |           |           |            |  |
| Excited State 71: | Singlet-A | 2.5698 eV | 482.47 nm | f = 0.0021 |  |
| 235 ->265         | -0.10605  |           |           |            |  |
| 237 ->265         | -0.18940  |           |           |            |  |
| 238 ->265         | 0.18254   |           |           |            |  |
| 248 ->265         | 0.24440   |           |           |            |  |
| 249 ->265         | 0.35316   |           |           |            |  |
| 251 ->265         | 0.44863   |           |           |            |  |
| Excited State 72: | Singlet-A | 2.5854 eV | 479.56 nm | f = 0.0038 |  |
| 252 ->271         | -0.18074  |           |           |            |  |
| 254 ->271         | 0.44493   |           |           |            |  |
| 255 ->271         | -0.25537  |           |           |            |  |
| 261 ->271         | -0.39341  |           |           |            |  |
| Excited State 73: | Singlet-A | 2.5899 eV | 478.73 nm | f = 0.0065 |  |

|                   |           |           |           |            |  |
|-------------------|-----------|-----------|-----------|------------|--|
| 238 ->266         | 0.23086   |           |           |            |  |
| 243 ->266         | -0.15220  |           |           |            |  |
| 244 ->266         | 0.51758   |           |           |            |  |
| 245 ->266         | -0.24266  |           |           |            |  |
| 252 ->266         | 0.11326   |           |           |            |  |
| Excited State 74: | Singlet-A | 2.5979 eV | 477.24 nm | f = 0.0024 |  |
| 246 ->267         | 0.12620   |           |           |            |  |
| 248 ->268         | -0.11766  |           |           |            |  |
| 249 ->268         | 0.15030   |           |           |            |  |
| 252 ->267         | 0.35152   |           |           |            |  |
| 253 ->267         | 0.13065   |           |           |            |  |
| 254 ->268         | 0.19148   |           |           |            |  |
| 255 ->268         | 0.32617   |           |           |            |  |
| 257 ->268         | 0.34353   |           |           |            |  |
| Excited State 75: | Singlet-A | 2.6140 eV | 474.31 nm | f = 0.0000 |  |
| 263 ->275         | 0.70678   |           |           |            |  |
| Excited State 76: | Singlet-A | 2.6155 eV | 474.03 nm | f = 0.0041 |  |
| 247 ->267         | -0.36238  |           |           |            |  |
| 252 ->267         | 0.46176   |           |           |            |  |
| 255 ->268         | -0.17296  |           |           |            |  |
| 257 ->268         | -0.24976  |           |           |            |  |
| Excited State 77: | Singlet-A | 2.6336 eV | 470.78 nm | f = 0.0008 |  |
| 235 ->265         | 0.10099   |           |           |            |  |
| 237 ->265         | 0.12415   |           |           |            |  |
| 248 ->265         | -0.29623  |           |           |            |  |
| 249 ->265         | -0.23793  |           |           |            |  |
| 251 ->265         | 0.51672   |           |           |            |  |
| 262 ->269         | -0.12054  |           |           |            |  |
| Excited State 78: | Singlet-A | 2.6345 eV | 470.61 nm | f = 0.0001 |  |
| 261 ->269         | 0.18028   |           |           |            |  |
| 262 ->269         | 0.66966   |           |           |            |  |
| Excited State 79: | Singlet-A | 2.6460 eV | 468.57 nm | f = 0.0011 |  |
| 247 ->267         | -0.13919  |           |           |            |  |
| 247 ->268         | -0.25890  |           |           |            |  |
| 252 ->268         | -0.23110  |           |           |            |  |
| 253 ->268         | 0.50484   |           |           |            |  |
| 254 ->268         | -0.13247  |           |           |            |  |
| 257 ->268         | 0.19077   |           |           |            |  |
| Excited State 80: | Singlet-A | 2.6586 eV | 466.35 nm | f = 0.0004 |  |
| 248 ->265         | -0.40056  |           |           |            |  |
| 249 ->265         | 0.45423   |           |           |            |  |
| 250 ->265         | -0.29786  |           |           |            |  |
| Excited State 81: | Singlet-A | 2.6625 eV | 465.67 nm | f = 0.0002 |  |
| 261 ->269         | 0.67596   |           |           |            |  |
| 262 ->269         | -0.17362  |           |           |            |  |

|                   |           |           |           |            |
|-------------------|-----------|-----------|-----------|------------|
| Excited State 82: | Singlet-A | 2.6630 eV | 465.59 nm | f = 0.0000 |
| 248 ->265         | -0.11465  |           |           |            |
| 249 ->265         | 0.28651   |           |           |            |
| 250 ->265         | 0.63136   |           |           |            |
| Excited State 83: | Singlet-A | 2.6667 eV | 464.94 nm | f = 0.0016 |
| 247 ->268         | -0.12397  |           |           |            |
| 254 ->268         | -0.25580  |           |           |            |
| 255 ->268         | 0.46341   |           |           |            |
| 257 ->268         | -0.39253  |           |           |            |
| Excited State 84: | Singlet-A | 2.6685 eV | 464.62 nm | f = 0.0000 |
| 263 ->276         | 0.70642   |           |           |            |
| Excited State 85: | Singlet-A | 2.6900 eV | 460.91 nm | f = 0.0021 |
| 247 ->268         | -0.14582  |           |           |            |
| 248 ->268         | -0.10457  |           |           |            |
| 249 ->268         | 0.14289   |           |           |            |
| 253 ->268         | 0.20683   |           |           |            |
| 254 ->268         | 0.51561   |           |           |            |
| 255 ->268         | -0.11558  |           |           |            |
| 256 ->268         | -0.10331  |           |           |            |
| 257 ->268         | -0.30053  |           |           |            |
| Excited State 86: | Singlet-A | 2.7074 eV | 457.95 nm | f = 0.0063 |
| 252 ->271         | -0.26088  |           |           |            |
| 253 ->271         | -0.15551  |           |           |            |
| 255 ->271         | 0.10144   |           |           |            |
| 261 ->271         | 0.10495   |           |           |            |
| 262 ->271         | 0.60057   |           |           |            |
| Excited State 87: | Singlet-A | 2.7128 eV | 457.03 nm | f = 0.0013 |
| 229 ->265         | 0.17061   |           |           |            |
| 231 ->265         | 0.19680   |           |           |            |
| 233 ->265         | -0.13805  |           |           |            |
| 235 ->265         | 0.18365   |           |           |            |
| 237 ->265         | 0.15243   |           |           |            |
| 238 ->266         | -0.11363  |           |           |            |
| 240 ->266         | -0.22261  |           |           |            |
| 241 ->266         | 0.15682   |           |           |            |
| 245 ->265         | -0.29337  |           |           |            |
| 247 ->265         | -0.15868  |           |           |            |
| 248 ->265         | 0.31851   |           |           |            |
| Excited State 88: | Singlet-A | 2.7194 eV | 455.92 nm | f = 0.0088 |
| 252 ->271         | 0.39957   |           |           |            |
| 253 ->271         | 0.22170   |           |           |            |
| 254 ->273         | 0.11212   |           |           |            |
| 261 ->271         | -0.34293  |           |           |            |
| 262 ->271         | 0.33387   |           |           |            |
| Excited State 89: | Singlet-A | 2.7204 eV | 455.75 nm | f = 0.0001 |

|                   |           |           |           |            |  |
|-------------------|-----------|-----------|-----------|------------|--|
| 261 ->270         | 0.17660   |           |           |            |  |
| 262 ->270         | 0.67548   |           |           |            |  |
| Excited State 90: | Singlet-A | 2.7347 eV | 453.37 nm | f = 0.0001 |  |
| 261 ->272         | 0.17735   |           |           |            |  |
| 262 ->272         | 0.66718   |           |           |            |  |
| Excited State 91: | Singlet-A | 2.7396 eV | 452.57 nm | f = 0.0011 |  |
| 247 ->268         | 0.49880   |           |           |            |  |
| 251 ->268         | -0.11559  |           |           |            |  |
| 252 ->268         | 0.10727   |           |           |            |  |
| 253 ->268         | 0.37975   |           |           |            |  |
| 255 ->268         | 0.12737   |           |           |            |  |
| Excited State 92: | Singlet-A | 2.7474 eV | 451.27 nm | f = 0.0025 |  |
| 240 ->266         | 0.23385   |           |           |            |  |
| 241 ->266         | -0.18523  |           |           |            |  |
| 247 ->265         | -0.18484  |           |           |            |  |
| 261 ->270         | 0.55203   |           |           |            |  |
| 262 ->270         | -0.12240  |           |           |            |  |
| Excited State 93: | Singlet-A | 2.7525 eV | 450.44 nm | f = 0.0085 |  |
| 240 ->266         | -0.28719  |           |           |            |  |
| 241 ->266         | 0.21809   |           |           |            |  |
| 245 ->265         | 0.11028   |           |           |            |  |
| 247 ->265         | 0.38802   |           |           |            |  |
| 261 ->270         | 0.37754   |           |           |            |  |
| 262 ->270         | -0.11096  |           |           |            |  |
| Excited State 94: | Singlet-A | 2.7625 eV | 448.81 nm | f = 0.0070 |  |
| 240 ->266         | 0.17561   |           |           |            |  |
| 241 ->266         | -0.18076  |           |           |            |  |
| 245 ->265         | -0.10039  |           |           |            |  |
| 247 ->265         | 0.39506   |           |           |            |  |
| 261 ->270         | -0.10344  |           |           |            |  |
| 261 ->272         | 0.41671   |           |           |            |  |
| Excited State 95: | Singlet-A | 2.7637 eV | 448.62 nm | f = 0.0038 |  |
| 240 ->266         | -0.17035  |           |           |            |  |
| 241 ->266         | 0.13407   |           |           |            |  |
| 245 ->265         | 0.11748   |           |           |            |  |
| 247 ->265         | -0.32413  |           |           |            |  |
| 261 ->272         | 0.50419   |           |           |            |  |
| 262 ->272         | -0.13863  |           |           |            |  |
| Excited State 96: | Singlet-A | 2.7711 eV | 447.42 nm | f = 0.0041 |  |
| 252 ->271         | 0.12060   |           |           |            |  |
| 254 ->271         | 0.12800   |           |           |            |  |
| 255 ->271         | -0.10537  |           |           |            |  |
| 261 ->271         | 0.14424   |           |           |            |  |
| 261 ->278         | 0.46581   |           |           |            |  |
| 262 ->278         | -0.33149  |           |           |            |  |
| 262 ->279         | 0.15933   |           |           |            |  |

|                    |           |           |           |            |
|--------------------|-----------|-----------|-----------|------------|
| Excited State 97:  | Singlet-A | 2.7743 eV | 446.90 nm | f = 0.0018 |
| 248 ->268          | -0.28337  |           |           |            |
| 249 ->268          | 0.33717   |           |           |            |
| 251 ->268          | 0.14039   |           |           |            |
| 252 ->268          | 0.20019   |           |           |            |
| 253 ->268          | 0.14190   |           |           |            |
| 254 ->268          | -0.27076  |           |           |            |
| 255 ->268          | -0.24923  |           |           |            |
| Excited State 98:  | Singlet-A | 2.7750 eV | 446.80 nm | f = 0.0180 |
| 237 ->266          | -0.26166  |           |           |            |
| 238 ->266          | 0.34320   |           |           |            |
| 241 ->266          | 0.15883   |           |           |            |
| 243 ->266          | 0.23136   |           |           |            |
| 244 ->266          | -0.23080  |           |           |            |
| 245 ->265          | -0.10661  |           |           |            |
| 247 ->265          | 0.10894   |           |           |            |
| 248 ->266          | -0.15329  |           |           |            |
| 249 ->266          | -0.11564  |           |           |            |
| 261 ->272          | 0.12511   |           |           |            |
| Excited State 99:  | Singlet-A | 2.7809 eV | 445.85 nm | f = 0.0037 |
| 252 ->271          | 0.18576   |           |           |            |
| 253 ->271          | 0.15810   |           |           |            |
| 254 ->271          | 0.29495   |           |           |            |
| 255 ->271          | -0.23324  |           |           |            |
| 261 ->271          | 0.42221   |           |           |            |
| 261 ->278          | -0.20728  |           |           |            |
| 262 ->278          | 0.19267   |           |           |            |
| Excited State 100: | Singlet-A | 2.7947 eV | 443.63 nm | f = 0.0028 |
| 261 ->279          | 0.22203   |           |           |            |
| 262 ->278          | 0.25032   |           |           |            |
| 262 ->279          | 0.57435   |           |           |            |
| Excited State 101: | Singlet-A | 2.8059 eV | 441.87 nm | f = 0.0062 |
| 246 ->268          | -0.30601  |           |           |            |
| 247 ->268          | -0.21905  |           |           |            |
| 252 ->268          | 0.54227   |           |           |            |
| Excited State 102: | Singlet-A | 2.8127 eV | 440.80 nm | f = 0.0000 |
| 264 ->280          | 0.70677   |           |           |            |
| Excited State 103: | Singlet-A | 2.8176 eV | 440.03 nm | f = 0.0001 |
| 246 ->265          | 0.69839   |           |           |            |
| Excited State 104: | Singlet-A | 2.8204 eV | 439.60 nm | f = 0.0005 |
| 259 ->269          | 0.65019   |           |           |            |
| 260 ->269          | -0.22417  |           |           |            |
| Excited State 105: | Singlet-A | 2.8406 eV | 436.48 nm | f = 0.0121 |
| 252 ->271          | 0.15257   |           |           |            |

|                    |           |           |           |            |
|--------------------|-----------|-----------|-----------|------------|
| 252 ->273          | -0.19835  |           |           |            |
| 253 ->273          | -0.15289  |           |           |            |
| 254 ->273          | -0.26669  |           |           |            |
| 255 ->273          | 0.20998   |           |           |            |
| 256 ->273          | 0.23311   |           |           |            |
| 261 ->273          | 0.34375   |           |           |            |
| 261 ->274          | -0.11327  |           |           |            |
| Excited State 106: | Singlet-A | 2.8552 eV | 434.23 nm | f = 0.0021 |
| 235 ->266          | -0.11191  |           |           |            |
| 237 ->266          | -0.19544  |           |           |            |
| 238 ->266          | 0.16926   |           |           |            |
| 245 ->265          | -0.12964  |           |           |            |
| 248 ->266          | 0.27166   |           |           |            |
| 249 ->266          | 0.34722   |           |           |            |
| 251 ->266          | 0.41538   |           |           |            |
| Excited State 107: | Singlet-A | 2.8605 eV | 433.43 nm | f = 0.0108 |
| 239 ->267          | 0.33550   |           |           |            |
| 240 ->267          | 0.10104   |           |           |            |
| 242 ->267          | -0.17128  |           |           |            |
| 246 ->268          | -0.23525  |           |           |            |
| 249 ->268          | 0.16786   |           |           |            |
| 251 ->267          | 0.33643   |           |           |            |
| 252 ->268          | -0.19309  |           |           |            |
| Excited State 108: | Singlet-A | 2.8623 eV | 433.16 nm | f = 0.0025 |
| 229 ->265          | 0.16712   |           |           |            |
| 231 ->265          | 0.16810   |           |           |            |
| 233 ->265          | -0.11075  |           |           |            |
| 235 ->265          | 0.14575   |           |           |            |
| 242 ->265          | -0.14166  |           |           |            |
| 243 ->265          | 0.12873   |           |           |            |
| 244 ->265          | 0.19558   |           |           |            |
| 245 ->265          | 0.47919   |           |           |            |
| Excited State 109: | Singlet-A | 2.8665 eV | 432.52 nm | f = 0.0004 |
| 261 ->279          | -0.20565  |           |           |            |
| 263 ->278          | 0.65504   |           |           |            |
| Excited State 110: | Singlet-A | 2.8800 eV | 430.50 nm | f = 0.0176 |
| 239 ->267          | 0.11889   |           |           |            |
| 246 ->268          | 0.45378   |           |           |            |
| 247 ->268          | -0.12172  |           |           |            |
| 249 ->268          | -0.13361  |           |           |            |
| 251 ->267          | 0.34663   |           |           |            |
| 251 ->268          | 0.10573   |           |           |            |
| 252 ->268          | 0.19988   |           |           |            |
| Excited State 111: | Singlet-A | 2.8909 eV | 428.88 nm | f = 0.0020 |
| 261 ->279          | 0.22391   |           |           |            |
| 263 ->277          | 0.34967   |           |           |            |
| 263 ->279          | 0.55390   |           |           |            |

|                    |           |           |           |            |
|--------------------|-----------|-----------|-----------|------------|
| Excited State 112: | Singlet-A | 2.8975 eV | 427.90 nm | f = 0.0000 |
| 264 ->281          | 0.70636   |           |           |            |
| Excited State 113: | Singlet-A | 2.9012 eV | 427.36 nm | f = 0.0133 |
| 251 ->271          | -0.17132  |           |           |            |
| 252 ->273          | -0.11495  |           |           |            |
| 254 ->273          | 0.19527   |           |           |            |
| 255 ->273          | -0.12622  |           |           |            |
| 256 ->273          | 0.45786   |           |           |            |
| 256 ->274          | -0.16488  |           |           |            |
| 261 ->273          | -0.22398  |           |           |            |
| Excited State 114: | Singlet-A | 2.9056 eV | 426.71 nm | f = 0.0018 |
| 259 ->270          | 0.60991   |           |           |            |
| 259 ->272          | 0.11861   |           |           |            |
| 260 ->270          | -0.21005  |           |           |            |
| 261 ->279          | -0.13261  |           |           |            |
| Excited State 115: | Singlet-A | 2.9095 eV | 426.14 nm | f = 0.0055 |
| 259 ->270          | 0.20623   |           |           |            |
| 259 ->272          | -0.13499  |           |           |            |
| 259 ->278          | -0.15231  |           |           |            |
| 261 ->278          | -0.13580  |           |           |            |
| 261 ->279          | 0.46066   |           |           |            |
| 262 ->279          | -0.13792  |           |           |            |
| 263 ->277          | -0.17386  |           |           |            |
| 263 ->278          | 0.21565   |           |           |            |
| 263 ->279          | -0.14032  |           |           |            |
| Excited State 116: | Singlet-A | 2.9206 eV | 424.52 nm | f = 0.0006 |
| 251 ->266          | -0.18127  |           |           |            |
| 259 ->272          | 0.58010   |           |           |            |
| 260 ->272          | -0.19967  |           |           |            |
| 261 ->279          | 0.13127   |           |           |            |
| Excited State 117: | Singlet-A | 2.9238 eV | 424.05 nm | f = 0.0015 |
| 237 ->266          | 0.10292   |           |           |            |
| 248 ->266          | -0.29466  |           |           |            |
| 249 ->266          | -0.19625  |           |           |            |
| 251 ->266          | 0.51019   |           |           |            |
| 259 ->272          | 0.20999   |           |           |            |
| Excited State 118: | Singlet-A | 2.9295 eV | 423.23 nm | f = 0.0002 |
| 261 ->273          | 0.19458   |           |           |            |
| 261 ->274          | 0.50528   |           |           |            |
| 262 ->273          | -0.17720  |           |           |            |
| 262 ->274          | -0.37046  |           |           |            |
| Excited State 119: | Singlet-A | 2.9324 eV | 422.81 nm | f = 0.0003 |
| 259 ->271          | -0.10567  |           |           |            |
| 263 ->277          | 0.57022   |           |           |            |
| 263 ->279          | -0.37075  |           |           |            |

|                    |           |           |           |            |
|--------------------|-----------|-----------|-----------|------------|
| Excited State 120: | Singlet-A | 2.9377 eV | 422.04 nm | f = 0.0010 |
| 261 ->273          | 0.13354   |           |           |            |
| 261 ->274          | 0.40143   |           |           |            |
| 262 ->273          | 0.22130   |           |           |            |
| 262 ->274          | 0.49450   |           |           |            |
| Excited State 121: | Singlet-A | 2.9399 eV | 421.73 nm | f = 0.0025 |
| 259 ->271          | 0.57392   |           |           |            |
| 260 ->271          | -0.32522  |           |           |            |
| 262 ->274          | -0.10016  |           |           |            |
| 263 ->279          | -0.10349  |           |           |            |
| Excited State 122: | Singlet-A | 2.9485 eV | 420.50 nm | f = 0.0021 |
| 236 ->267          | -0.10235  |           |           |            |
| 239 ->267          | -0.31859  |           |           |            |
| 240 ->267          | -0.10599  |           |           |            |
| 241 ->267          | -0.10005  |           |           |            |
| 242 ->267          | 0.16474   |           |           |            |
| 246 ->267          | -0.11101  |           |           |            |
| 246 ->268          | -0.10268  |           |           |            |
| 249 ->267          | -0.23920  |           |           |            |
| 251 ->267          | 0.35193   |           |           |            |
| 262 ->273          | -0.26477  |           |           |            |
| Excited State 123: | Singlet-A | 2.9494 eV | 420.37 nm | f = 0.0001 |
| 259 ->271          | 0.33123   |           |           |            |
| 260 ->271          | 0.62016   |           |           |            |
| Excited State 124: | Singlet-A | 2.9500 eV | 420.29 nm | f = 0.0015 |
| 248 ->266          | -0.38869  |           |           |            |
| 249 ->266          | 0.47462   |           |           |            |
| 250 ->266          | -0.28630  |           |           |            |
| Excited State 125: | Singlet-A | 2.9515 eV | 420.07 nm | f = 0.0075 |
| 239 ->267          | -0.13883  |           |           |            |
| 249 ->267          | -0.10557  |           |           |            |
| 251 ->267          | 0.15149   |           |           |            |
| 261 ->273          | -0.12463  |           |           |            |
| 261 ->274          | 0.10976   |           |           |            |
| 262 ->273          | 0.53061   |           |           |            |
| 262 ->274          | -0.25938  |           |           |            |
| Excited State 126: | Singlet-A | 2.9548 eV | 419.61 nm | f = 0.0000 |
| 248 ->266          | -0.10205  |           |           |            |
| 249 ->266          | 0.27842   |           |           |            |
| 250 ->266          | 0.63789   |           |           |            |
| Excited State 127: | Singlet-A | 2.9644 eV | 418.25 nm | f = 0.0000 |
| 259 ->269          | 0.22917   |           |           |            |
| 260 ->269          | 0.66885   |           |           |            |
| Excited State 128: | Singlet-A | 2.9670 eV | 417.88 nm | f = 0.0066 |



|                    |           |           |           |            |
|--------------------|-----------|-----------|-----------|------------|
| 252 ->273          | -0.15202  |           |           |            |
| 259 ->271          | -0.11376  |           |           |            |
| 259 ->278          | 0.32336   |           |           |            |
| 259 ->279          | 0.20247   |           |           |            |
| 260 ->278          | -0.10998  |           |           |            |
| 261 ->273          | -0.14279  |           |           |            |
| 261 ->278          | -0.29231  |           |           |            |
| 262 ->278          | -0.29488  |           |           |            |
| 262 ->279          | 0.11480   |           |           |            |
| Excited State 129: | Singlet-A | 2.9738 eV | 416.92 nm | f = 0.0109 |
| 252 ->273          | 0.38056   |           |           |            |
| 252 ->274          | -0.13789  |           |           |            |
| 253 ->273          | 0.23492   |           |           |            |
| 256 ->273          | 0.15223   |           |           |            |
| 259 ->278          | 0.14669   |           |           |            |
| 261 ->273          | 0.25901   |           |           |            |
| 261 ->274          | -0.12215  |           |           |            |
| 262 ->273          | 0.21693   |           |           |            |
| 262 ->274          | -0.10499  |           |           |            |
| Excited State 130: | Singlet-A | 2.9765 eV | 416.54 nm | f = 0.0000 |
| 264 ->282          | 0.70679   |           |           |            |
| Excited State 131: | Singlet-A | 2.9931 eV | 414.23 nm | f = 0.0003 |
| 229 ->265          | -0.11574  |           |           |            |
| 231 ->265          | -0.12073  |           |           |            |
| 238 ->265          | -0.14769  |           |           |            |
| 243 ->265          | 0.58500   |           |           |            |
| 244 ->265          | 0.23574   |           |           |            |
| Excited State 132: | Singlet-A | 3.0009 eV | 413.16 nm | f = 0.0215 |
| 259 ->278          | 0.33888   |           |           |            |
| 259 ->279          | 0.20307   |           |           |            |
| 260 ->278          | -0.11538  |           |           |            |
| 261 ->278          | 0.22991   |           |           |            |
| 261 ->279          | 0.18878   |           |           |            |
| 262 ->278          | 0.31214   |           |           |            |
| 262 ->279          | -0.21992  |           |           |            |
| 263 ->279          | -0.10217  |           |           |            |
| Excited State 133: | Singlet-A | 3.0104 eV | 411.86 nm | f = 0.0013 |
| 231 ->266          | 0.10099   |           |           |            |
| 239 ->267          | -0.11255  |           |           |            |
| 245 ->266          | -0.18662  |           |           |            |
| 247 ->266          | -0.11150  |           |           |            |
| 248 ->266          | 0.16342   |           |           |            |
| 248 ->267          | 0.45163   |           |           |            |
| 249 ->267          | 0.31773   |           |           |            |
| 251 ->267          | 0.12316   |           |           |            |
| Excited State 134: | Singlet-A | 3.0105 eV | 411.84 nm | f = 0.0013 |
| 229 ->266          | -0.13527  |           |           |            |

|                    |           |           |           |            |
|--------------------|-----------|-----------|-----------|------------|
| 231 ->266          | -0.15773  |           |           |            |
| 233 ->266          | 0.11161   |           |           |            |
| 235 ->266          | -0.14628  |           |           |            |
| 237 ->266          | -0.11450  |           |           |            |
| 242 ->265          | 0.14172   |           |           |            |
| 245 ->266          | 0.29170   |           |           |            |
| 247 ->266          | 0.17492   |           |           |            |
| 248 ->266          | -0.25498  |           |           |            |
| 248 ->267          | 0.28893   |           |           |            |
| 249 ->267          | 0.20279   |           |           |            |
| Excited State 135: | Singlet-A | 3.0193 eV | 410.64 nm | f = 0.0000 |
| 258 ->271          | 0.70587   |           |           |            |
| Excited State 136: | Singlet-A | 3.0255 eV | 409.79 nm | f = 0.0006 |
| 229 ->265          | 0.12832   |           |           |            |
| 231 ->265          | 0.15085   |           |           |            |
| 238 ->265          | 0.17306   |           |           |            |
| 239 ->265          | 0.16505   |           |           |            |
| 240 ->265          | -0.21662  |           |           |            |
| 241 ->265          | -0.18120  |           |           |            |
| 242 ->265          | 0.49521   |           |           |            |
| 245 ->266          | -0.11682  |           |           |            |
| Excited State 137: | Singlet-A | 3.0270 eV | 409.59 nm | f = 0.0001 |
| 261 ->275          | 0.52849   |           |           |            |
| 262 ->275          | -0.43360  |           |           |            |
| Excited State 138: | Singlet-A | 3.0346 eV | 408.57 nm | f = 0.0032 |
| 252 ->273          | 0.17179   |           |           |            |
| 254 ->273          | -0.25236  |           |           |            |
| 255 ->273          | 0.13571   |           |           |            |
| 261 ->273          | -0.27170  |           |           |            |
| 261 ->274          | 0.10799   |           |           |            |
| 261 ->275          | 0.24020   |           |           |            |
| 262 ->275          | 0.41754   |           |           |            |
| Excited State 139: | Singlet-A | 3.0351 eV | 408.51 nm | f = 0.0000 |
| 258 ->269          | 0.70442   |           |           |            |
| Excited State 140: | Singlet-A | 3.0378 eV | 408.14 nm | f = 0.0039 |
| 252 ->273          | -0.15054  |           |           |            |
| 254 ->273          | 0.23629   |           |           |            |
| 255 ->273          | -0.12906  |           |           |            |
| 261 ->273          | 0.25405   |           |           |            |
| 261 ->275          | 0.38709   |           |           |            |
| 262 ->275          | 0.34898   |           |           |            |
| Excited State 141: | Singlet-A | 3.0524 eV | 406.18 nm | f = 0.0000 |
| 264 ->283          | 0.70685   |           |           |            |
| Excited State 142: | Singlet-A | 3.0525 eV | 406.17 nm | f = 0.0006 |
| 245 ->266          | -0.10217  |           |           |            |

|                    |           |           |           |            |  |
|--------------------|-----------|-----------|-----------|------------|--|
| 247 ->266          | 0.65512   |           |           |            |  |
| 248 ->266          | 0.11817   |           |           |            |  |
| Excited State 143: | Singlet-A | 3.0534 eV | 406.05 nm | f = 0.0000 |  |
| 259 ->270          | 0.22900   |           |           |            |  |
| 260 ->270          | 0.66823   |           |           |            |  |
| Excited State 144: | Singlet-A | 3.0693 eV | 403.95 nm | f = 0.0000 |  |
| 259 ->272          | 0.22878   |           |           |            |  |
| 260 ->272          | 0.66895   |           |           |            |  |
| Excited State 145: | Singlet-A | 3.0726 eV | 403.52 nm | f = 0.0000 |  |
| 250 ->267          | 0.69946   |           |           |            |  |
| Excited State 146: | Singlet-A | 3.0820 eV | 402.28 nm | f = 0.0020 |  |
| 239 ->268          | 0.27706   |           |           |            |  |
| 242 ->268          | -0.13807  |           |           |            |  |
| 251 ->268          | 0.29968   |           |           |            |  |
| 261 ->276          | 0.41830   |           |           |            |  |
| 262 ->276          | -0.27031  |           |           |            |  |
| Excited State 147: | Singlet-A | 3.0836 eV | 402.07 nm | f = 0.0009 |  |
| 239 ->268          | 0.27309   |           |           |            |  |
| 242 ->268          | -0.13665  |           |           |            |  |
| 247 ->268          | 0.10109   |           |           |            |  |
| 251 ->268          | 0.30722   |           |           |            |  |
| 261 ->276          | -0.30735  |           |           |            |  |
| 262 ->276          | 0.38762   |           |           |            |  |
| Excited State 148: | Singlet-A | 3.0916 eV | 401.04 nm | f = 0.0014 |  |
| 261 ->276          | 0.46374   |           |           |            |  |
| 262 ->276          | 0.51115   |           |           |            |  |
| Excited State 149: | Singlet-A | 3.1097 eV | 398.70 nm | f = 0.0001 |  |
| 246 ->266          | 0.69832   |           |           |            |  |
| Excited State 150: | Singlet-A | 3.1213 eV | 397.22 nm | f = 0.0106 |  |
| 249 ->271          | -0.21435  |           |           |            |  |
| 251 ->271          | 0.54801   |           |           |            |  |
| 252 ->273          | -0.11234  |           |           |            |  |
| 255 ->271          | -0.16079  |           |           |            |  |
| 256 ->273          | 0.13016   |           |           |            |  |
| Excited State 151: | Singlet-A | 3.1238 eV | 396.91 nm | f = 0.0000 |  |
| 237 ->265          | -0.14423  |           |           |            |  |
| 238 ->265          | -0.17596  |           |           |            |  |
| 239 ->265          | -0.20435  |           |           |            |  |
| 240 ->265          | 0.30420   |           |           |            |  |
| 241 ->265          | 0.38221   |           |           |            |  |
| 242 ->265          | 0.38749   |           |           |            |  |
| Excited State 152: | Singlet-A | 3.1241 eV | 396.86 nm | f = 0.0000 |  |
| 258 ->270          | 0.70409   |           |           |            |  |

|                    |           |           |           |            |
|--------------------|-----------|-----------|-----------|------------|
| Excited State 153: | Singlet-A | 3.1354 eV | 395.44 nm | f = 0.0002 |
| 229 ->265          | -0.11227  |           |           |            |
| 231 ->265          | -0.10552  |           |           |            |
| 235 ->265          | -0.12820  |           |           |            |
| 237 ->265          | 0.47924   |           |           |            |
| 238 ->265          | 0.33067   |           |           |            |
| 240 ->265          | 0.15470   |           |           |            |
| 241 ->265          | 0.17820   |           |           |            |
| 242 ->265          | 0.13586   |           |           |            |
| Excited State 154: | Singlet-A | 3.1400 eV | 394.85 nm | f = 0.0000 |
| 258 ->272          | 0.70419   |           |           |            |
| Excited State 155: | Singlet-A | 3.1523 eV | 393.31 nm | f = 0.0011 |
| 229 ->266          | 0.16302   |           |           |            |
| 231 ->266          | 0.16305   |           |           |            |
| 233 ->266          | -0.10754  |           |           |            |
| 235 ->266          | 0.14040   |           |           |            |
| 241 ->266          | 0.12833   |           |           |            |
| 242 ->266          | -0.14504  |           |           |            |
| 243 ->266          | 0.12761   |           |           |            |
| 244 ->266          | 0.20565   |           |           |            |
| 245 ->266          | 0.48503   |           |           |            |
| Excited State 156: | Singlet-A | 3.1595 eV | 392.42 nm | f = 0.0081 |
| 236 ->268          | -0.10527  |           |           |            |
| 239 ->268          | -0.33543  |           |           |            |
| 240 ->268          | -0.11292  |           |           |            |
| 241 ->268          | -0.10651  |           |           |            |
| 242 ->268          | 0.17498   |           |           |            |
| 246 ->268          | -0.11671  |           |           |            |
| 249 ->268          | -0.24807  |           |           |            |
| 251 ->268          | 0.44836   |           |           |            |
| Excited State 157: | Singlet-A | 3.1657 eV | 391.65 nm | f = 0.0001 |
| 254 ->269          | 0.15183   |           |           |            |
| 255 ->269          | 0.26839   |           |           |            |
| 256 ->269          | 0.16267   |           |           |            |
| 257 ->269          | 0.60195   |           |           |            |
| Excited State 158: | Singlet-A | 3.1676 eV | 391.41 nm | f = 0.0133 |
| 253 ->278          | 0.14923   |           |           |            |
| 257 ->271          | -0.10081  |           |           |            |
| 259 ->274          | 0.17533   |           |           |            |
| 259 ->278          | -0.29180  |           |           |            |
| 259 ->279          | 0.47921   |           |           |            |
| 260 ->279          | -0.16257  |           |           |            |
| Excited State 159: | Singlet-A | 3.1711 eV | 390.98 nm | f = 0.0006 |
| 256 ->271          | 0.15600   |           |           |            |
| 257 ->271          | 0.66118   |           |           |            |

|                    |           |           |           |            |
|--------------------|-----------|-----------|-----------|------------|
| Excited State 160: | Singlet-A | 3.1724 eV | 390.83 nm | f = 0.0003 |
| 237 ->265          | -0.10548  |           |           |            |
| 239 ->265          | 0.60452   |           |           |            |
| 240 ->265          | 0.17460   |           |           |            |
| 241 ->265          | 0.18033   |           |           |            |
| 259 ->274          | -0.13572  |           |           |            |
| Excited State 161: | Singlet-A | 3.1724 eV | 390.82 nm | f = 0.0009 |
| 239 ->265          | 0.16428   |           |           |            |
| 259 ->273          | 0.32368   |           |           |            |
| 259 ->274          | 0.52092   |           |           |            |
| 260 ->273          | -0.12593  |           |           |            |
| 260 ->274          | -0.18197  |           |           |            |
| Excited State 162: | Singlet-A | 3.1847 eV | 389.31 nm | f = 0.0009 |
| 259 ->273          | 0.50718   |           |           |            |
| 259 ->274          | -0.30305  |           |           |            |
| 260 ->273          | -0.31187  |           |           |            |
| 260 ->274          | 0.15171   |           |           |            |
| Excited State 163: | Singlet-A | 3.1930 eV | 388.30 nm | f = 0.0000 |
| 259 ->273          | 0.32962   |           |           |            |
| 259 ->274          | -0.12513  |           |           |            |
| 260 ->273          | 0.58257   |           |           |            |
| 260 ->274          | -0.18661  |           |           |            |
| Excited State 164: | Singlet-A | 3.1959 eV | 387.94 nm | f = 0.0000 |
| 255 ->269          | 0.11274   |           |           |            |
| 256 ->269          | 0.65216   |           |           |            |
| 257 ->269          | -0.24038  |           |           |            |
| Excited State 165: | Singlet-A | 3.2131 eV | 385.87 nm | f = 0.0007 |
| 202 ->265          | -0.10442  |           |           |            |
| 210 ->265          | 0.12607   |           |           |            |
| 211 ->265          | 0.10023   |           |           |            |
| 214 ->265          | 0.21519   |           |           |            |
| 215 ->265          | 0.23714   |           |           |            |
| 217 ->265          | 0.41940   |           |           |            |
| 220 ->265          | 0.19490   |           |           |            |
| 239 ->265          | 0.12247   |           |           |            |
| 244 ->272          | 0.10478   |           |           |            |
| Excited State 166: | Singlet-A | 3.2133 eV | 385.85 nm | f = 0.0000 |
| 264 ->284          | 0.70486   |           |           |            |
| Excited State 167: | Singlet-A | 3.2197 eV | 385.08 nm | f = 0.0000 |
| 254 ->269          | 0.29959   |           |           |            |
| 255 ->269          | 0.51791   |           |           |            |
| 256 ->269          | -0.21513  |           |           |            |
| 257 ->269          | -0.25820  |           |           |            |
| Excited State 168: | Singlet-A | 3.2279 eV | 384.11 nm | f = 0.0003 |
| 239 ->268          | -0.12563  |           |           |            |

|                    |           |           |           |            |
|--------------------|-----------|-----------|-----------|------------|
| 248 ->268          | 0.54338   |           |           |            |
| 249 ->268          | 0.37427   |           |           |            |
| 251 ->268          | 0.13717   |           |           |            |
| Excited State 169: | Singlet-A | 3.2376 eV | 382.95 nm | f = 0.0000 |
| 263 ->280          | 0.70673   |           |           |            |
| Excited State 170: | Singlet-A | 3.2535 eV | 381.07 nm | f = 0.0002 |
| 254 ->270          | 0.16009   |           |           |            |
| 255 ->270          | 0.28270   |           |           |            |
| 256 ->270          | 0.16493   |           |           |            |
| 257 ->270          | 0.59612   |           |           |            |
| Excited State 171: | Singlet-A | 3.2628 eV | 379.99 nm | f = 0.0000 |
| 258 ->273          | 0.66994   |           |           |            |
| 258 ->274          | -0.22169  |           |           |            |
| Excited State 172: | Singlet-A | 3.2642 eV | 379.83 nm | f = 0.0000 |
| 259 ->274          | 0.22336   |           |           |            |
| 260 ->273          | 0.20879   |           |           |            |
| 260 ->274          | 0.63199   |           |           |            |
| Excited State 173: | Singlet-A | 3.2669 eV | 379.51 nm | f = 0.0000 |
| 245 ->267          | 0.65913   |           |           |            |
| 259 ->275          | 0.11300   |           |           |            |
| Excited State 174: | Singlet-A | 3.2686 eV | 379.31 nm | f = 0.0112 |
| 252 ->271          | -0.12986  |           |           |            |
| 253 ->271          | 0.39876   |           |           |            |
| 254 ->271          | 0.26281   |           |           |            |
| 255 ->271          | 0.46588   |           |           |            |
| 257 ->271          | -0.11883  |           |           |            |
| Excited State 175: | Singlet-A | 3.2690 eV | 379.27 nm | f = 0.0003 |
| 254 ->272          | 0.15084   |           |           |            |
| 255 ->272          | 0.26592   |           |           |            |
| 256 ->272          | 0.15319   |           |           |            |
| 257 ->272          | 0.54902   |           |           |            |
| 259 ->275          | 0.23530   |           |           |            |
| Excited State 176: | Singlet-A | 3.2691 eV | 379.27 nm | f = 0.0001 |
| 245 ->267          | -0.11400  |           |           |            |
| 255 ->272          | -0.10468  |           |           |            |
| 257 ->272          | -0.21595  |           |           |            |
| 259 ->275          | 0.59816   |           |           |            |
| 260 ->275          | -0.21339  |           |           |            |
| Excited State 177: | Singlet-A | 3.2829 eV | 377.67 nm | f = 0.0001 |
| 243 ->266          | -0.24044  |           |           |            |
| 252 ->269          | -0.20428  |           |           |            |
| 253 ->269          | 0.54595   |           |           |            |
| 254 ->269          | -0.15208  |           |           |            |
| 255 ->269          | 0.21766   |           |           |            |

|                    |           |           |           |            |
|--------------------|-----------|-----------|-----------|------------|
| Excited State 178: | Singlet-A | 3.2847 eV | 377.46 nm | f = 0.0003 |
| 229 ->266          | -0.10358  |           |           |            |
| 231 ->266          | -0.10860  |           |           |            |
| 238 ->266          | -0.13585  |           |           |            |
| 243 ->266          | 0.51887   |           |           |            |
| 244 ->266          | 0.20642   |           |           |            |
| 253 ->269          | 0.23974   |           |           |            |
| 256 ->270          | 0.17145   |           |           |            |
| Excited State 179: | Singlet-A | 3.2854 eV | 377.38 nm | f = 0.0000 |
| 243 ->266          | -0.15966  |           |           |            |
| 255 ->270          | 0.11556   |           |           |            |
| 256 ->270          | 0.62107   |           |           |            |
| 257 ->270          | -0.23755  |           |           |            |
| Excited State 180: | Singlet-A | 3.2907 eV | 376.77 nm | f = 0.0000 |
| 250 ->268          | 0.69954   |           |           |            |
| Excited State 181: | Singlet-A | 3.3006 eV | 375.64 nm | f = 0.0001 |
| 255 ->272          | 0.12307   |           |           |            |
| 256 ->272          | 0.64085   |           |           |            |
| 257 ->272          | -0.25785  |           |           |            |
| Excited State 182: | Singlet-A | 3.3021 eV | 375.47 nm | f = 0.0020 |
| 251 ->271          | -0.14154  |           |           |            |
| 252 ->271          | -0.32162  |           |           |            |
| 253 ->271          | 0.43021   |           |           |            |
| 254 ->271          | -0.28501  |           |           |            |
| 255 ->271          | -0.27917  |           |           |            |
| Excited State 183: | Singlet-A | 3.3071 eV | 374.91 nm | f = 0.0003 |
| 254 ->270          | 0.29568   |           |           |            |
| 255 ->270          | 0.50798   |           |           |            |
| 256 ->270          | -0.23533  |           |           |            |
| 257 ->270          | -0.26313  |           |           |            |
| Excited State 184: | Singlet-A | 3.3086 eV | 374.73 nm | f = 0.0002 |
| 221 ->267          | 0.16602   |           |           |            |
| 239 ->267          | 0.11048   |           |           |            |
| 240 ->267          | -0.11057  |           |           |            |
| 241 ->267          | -0.14019  |           |           |            |
| 242 ->267          | 0.26611   |           |           |            |
| 243 ->267          | 0.41670   |           |           |            |
| 244 ->267          | 0.29135   |           |           |            |
| 245 ->267          | 0.12440   |           |           |            |
| 259 ->276          | 0.13984   |           |           |            |
| Excited State 185: | Singlet-A | 3.3110 eV | 374.46 nm | f = 0.0000 |
| 236 ->265          | 0.69362   |           |           |            |
| Excited State 186: | Singlet-A | 3.3134 eV | 374.19 nm | f = 0.0005 |
| 229 ->266          | 0.12101   |           |           |            |

|                    |           |           |           |            |
|--------------------|-----------|-----------|-----------|------------|
| 231 ->266          | 0.14452   |           |           |            |
| 238 ->266          | 0.16704   |           |           |            |
| 239 ->266          | 0.17510   |           |           |            |
| 240 ->266          | -0.23363  |           |           |            |
| 241 ->266          | -0.19153  |           |           |            |
| 242 ->266          | 0.51649   |           |           |            |
| Excited State 187: | Singlet-A | 3.3218 eV | 373.25 nm | f = 0.0009 |
| 253 ->272          | -0.10438  |           |           |            |
| 254 ->272          | 0.29130   |           |           |            |
| 255 ->272          | 0.49581   |           |           |            |
| 256 ->272          | -0.24053  |           |           |            |
| 257 ->272          | -0.26907  |           |           |            |
| Excited State 188: | Singlet-A | 3.3237 eV | 373.03 nm | f = 0.0000 |
| 263 ->281          | 0.70631   |           |           |            |
| Excited State 189: | Singlet-A | 3.3249 eV | 372.90 nm | f = 0.0000 |
| 259 ->276          | 0.63837   |           |           |            |
| 260 ->276          | -0.22797  |           |           |            |
| Excited State 190: | Singlet-A | 3.3255 eV | 372.83 nm | f = 0.0000 |
| 253 ->269          | 0.25739   |           |           |            |
| 254 ->269          | 0.58787   |           |           |            |
| 255 ->269          | -0.28951  |           |           |            |
| Excited State 191: | Singlet-A | 3.3296 eV | 372.37 nm | f = 0.0001 |
| 264 ->285          | 0.70338   |           |           |            |
| Excited State 192: | Singlet-A | 3.3349 eV | 371.77 nm | f = 0.0000 |
| 258 ->273          | 0.22072   |           |           |            |
| 258 ->274          | 0.66778   |           |           |            |
| Excited State 193: | Singlet-A | 3.3452 eV | 370.63 nm | f = 0.0000 |
| 261 ->277          | 0.18937   |           |           |            |
| 262 ->277          | 0.67190   |           |           |            |
| Excited State 194: | Singlet-A | 3.3505 eV | 370.04 nm | f = 0.0004 |
| 229 ->265          | -0.16019  |           |           |            |
| 231 ->265          | -0.17195  |           |           |            |
| 232 ->265          | 0.16510   |           |           |            |
| 233 ->265          | 0.15909   |           |           |            |
| 235 ->265          | 0.54595   |           |           |            |
| 238 ->265          | 0.14775   |           |           |            |
| Excited State 195: | Singlet-A | 3.3558 eV | 369.46 nm | f = 0.0022 |
| 249 ->273          | -0.21133  |           |           |            |
| 251 ->271          | 0.10367   |           |           |            |
| 251 ->273          | 0.53263   |           |           |            |
| 251 ->274          | -0.18924  |           |           |            |
| 254 ->273          | -0.12407  |           |           |            |
| 255 ->273          | -0.11929  |           |           |            |



|                    |           |           |           |            |
|--------------------|-----------|-----------|-----------|------------|
| Excited State 196: | Singlet-A | 3.3576 eV | 369.26 nm | f = 0.0000 |
| 259 ->275          | 0.23644   |           |           |            |
| 260 ->275          | 0.66621   |           |           |            |
| Excited State 197: | Singlet-A | 3.3704 eV | 367.86 nm | f = 0.0003 |
| 252 ->270          | -0.22380  |           |           |            |
| 253 ->270          | 0.59599   |           |           |            |
| 254 ->270          | -0.15751  |           |           |            |
| 255 ->270          | 0.22801   |           |           |            |
| Excited State 198: | Singlet-A | 3.3713 eV | 367.77 nm | f = 0.0001 |
| 261 ->277          | 0.66148   |           |           |            |
| 262 ->277          | -0.17952  |           |           |            |
| Excited State 199: | Singlet-A | 3.3786 eV | 366.96 nm | f = 0.0009 |
| 221 ->267          | -0.19755  |           |           |            |
| 243 ->267          | 0.24085   |           |           |            |
| 244 ->267          | 0.16894   |           |           |            |
| 248 ->274          | -0.21234  |           |           |            |
| 249 ->274          | 0.23220   |           |           |            |
| 251 ->274          | 0.13436   |           |           |            |
| 254 ->274          | 0.14054   |           |           |            |
| 255 ->273          | 0.10139   |           |           |            |
| 255 ->274          | 0.26370   |           |           |            |
| 257 ->274          | 0.15211   |           |           |            |
| Excited State 200: | Singlet-A | 3.3835 eV | 366.44 nm | f = 0.0013 |
| 252 ->272          | -0.21037  |           |           |            |
| 253 ->272          | 0.55880   |           |           |            |
| 253 ->278          | 0.11579   |           |           |            |
| 254 ->272          | -0.13885  |           |           |            |
| 255 ->272          | 0.22087   |           |           |            |

# Orbital coefficients of atoms corresponding to Peak 1 in the absorption spectrum of 1

## Peak 1: 238 → 265

| 238 (HOMO-26) |   |       |          |
|---------------|---|-------|----------|
| 24            | S | 1S    | 0.00646  |
|               |   | 2S    | 0.02232  |
|               |   | 3PX   | -0.09526 |
|               |   | 3PY   | 0.15244  |
|               |   | 3PZ   | -0.09779 |
|               |   | 4PX   | -0.10099 |
|               |   | 4PY   | 0.15328  |
| 27            | S | 1S    | 0.02383  |
|               |   | 2S    | 0.03833  |
|               |   | 3PX   | -0.10996 |
|               |   | 3PY   | -0.16137 |
|               |   | 3PZ   | 0.01627  |
|               |   | 4PX   | -0.10975 |
|               |   | 4PY   | -0.15991 |
| 28            | S | 4PZ   | 0.00753  |
|               |   | 1S    | -0.01106 |
|               |   | 2S    | -0.02854 |
|               |   | 3PX   | 0.15470  |
|               |   | 3PY   | 0.07661  |
|               |   | 3PZ   | 0.04172  |
|               |   | 4PX   | 0.15678  |
|               |   | 4PY   | 0.07756  |
|               |   | 4PZ   | 0.03960  |
|               |   | ..... |          |

| 265 (LUMO) |   |               |
|------------|---|---------------|
| 3          | W | 1S -0.00229   |
|            |   | 2S -0.00512   |
|            |   | 3S -0.03402   |
|            |   | 4PX -0.01411  |
|            |   | 4PY 0.00778   |
|            |   | 4PZ -0.00066  |
|            |   | 5PX 0.03073   |
|            |   | 5PY -0.00246  |
|            |   | 5PZ -0.00001  |
|            |   | 6PX -0.01790  |
|            |   | 6PY 0.03209   |
|            |   | 6PZ -0.01576  |
|            |   | 7D 0 -0.22854 |
|            |   | 7D+1 0.24812  |
|            |   | 7D-1 0.45121  |
|            |   | 7D+2 0.35356  |
|            |   | 7D-2 -0.29010 |
|            |   | 8D 0 -0.09704 |
|            |   | 8D+1 0.09779  |
|            |   | 8D-1 0.18557  |
|            |   | 8D+2 0.15361  |
|            |   | 8D-2 -0.12214 |

|    |   |     |          |
|----|---|-----|----------|
| 24 | S | 1S  | -0.00746 |
|    |   | 2S  | -0.01600 |
|    |   | 3PX | -0.05506 |
|    |   | 3PY | 0.07259  |
|    |   | 3PZ | -0.09378 |
|    |   | 4PX | -0.08178 |
|    |   | 4PY | 0.10416  |
|    |   | 4PZ | -0.14200 |
| 27 | S | 1S  | -0.02179 |
|    |   | 2S  | -0.04104 |
|    |   | 3PX | 0.11190  |
|    |   | 3PY | 0.07422  |
|    |   | 3PZ | -0.05897 |
|    |   | 4PX | 0.16148  |
|    |   | 4PY | 0.11181  |
|    |   | 4PZ | -0.07468 |
| 28 | S | 1S  | -0.00513 |
|    |   | 2S  | -0.00587 |
|    |   | 3PX | -0.10447 |
|    |   | 3PY | -0.01617 |
|    |   | 3PZ | 0.07036  |
|    |   | 4PX | -0.15710 |
|    |   | 4PY | -0.02301 |
|    |   | 4PZ | 0.10543  |
| 29 | S | 1S  | -0.01729 |
|    |   | 2S  | -0.03520 |
|    |   | 3PX | 0.03132  |
|    |   | 3PY | -0.09702 |
|    |   | 3PZ | 0.06931  |
|    |   | 4PX | 0.04874  |
|    |   | 4PY | -0.15452 |
|    |   | 4PZ | 0.10369  |

.....

# Orbital coefficients of atoms corresponding to Peak 2 in the absorption spectrum of 1

## Peak 2: 246 → 268

| 246 (HOMO-18) |   |     |          |
|---------------|---|-----|----------|
| 23            | S | 1S  | 0.00840  |
|               |   | 2S  | 0.02404  |
|               |   | 3PX | 0.00226  |
|               |   | 3PY | -0.03477 |
|               |   | 3PZ | -0.21235 |
|               |   | 4PX | 0.00144  |
|               |   | 4PY | -0.03713 |
|               |   | 4PZ | -0.21432 |
| 25            | S | 1S  | -0.01364 |
|               |   | 2S  | -0.02842 |
|               |   | 3PX | -0.06054 |
|               |   | 3PY | -0.20156 |
|               |   | 3PZ | -0.03661 |
|               |   | 4PX | -0.06794 |
|               |   | 4PY | -0.20460 |
|               |   | 4PZ | -0.03660 |
| 26            | S | 1S  | 0.00703  |
|               |   | 2S  | 0.01308  |
|               |   | 3PX | -0.02044 |
|               |   | 3PY | 0.02352  |
|               |   | 3PZ | 0.22933  |
|               |   | 4PX | -0.02202 |
|               |   | 4PY | 0.02962  |
|               |   | 4PZ | 0.23336  |
| 30            | S | 1S  | -0.01259 |
|               |   | 2S  | -0.02306 |
|               |   | 3PX | 0.03702  |
|               |   | 3PY | 0.21889  |
|               |   | 3PZ | -0.00600 |
|               |   | 4PX | 0.03320  |
|               |   | 4PY | 0.22124  |
|               |   | 4PZ | -0.00659 |

.....

| 268 (LUMO+3) |   |     |          |
|--------------|---|-----|----------|
| 2            | W | 1S  | -0.00634 |
|              |   | 2S  | -0.01798 |
|              |   | 3S  | -0.09348 |
|              |   | 4PX | -0.00467 |
|              |   | 4PY | 0.01779  |
|              |   | 4PZ | -0.03081 |
|              |   | 5PX | 0.01640  |
|              |   | 5PY | -0.02824 |
|              |   | 5PZ | 0.02325  |
|              |   | 6PX | 0.04564  |
|              |   | 6PY | -0.07851 |
|              |   | 6PZ | 0.10040  |

|    |   |       |          |
|----|---|-------|----------|
|    |   | 7D 0  | 0.01840  |
|    |   | 7D+1  | 0.09248  |
|    |   | 7D-1  | 0.66961  |
|    |   | 7D+2  | -0.26299 |
|    |   | 7D-2  | 0.02472  |
|    |   | 8D 0  | -0.00216 |
|    |   | 8D+1  | 0.03002  |
|    |   | 8D-1  | 0.29643  |
|    |   | 8D+2  | -0.10430 |
|    |   | 8D-2  | 0.00049  |
| 23 | S | 1S    | -0.01030 |
|    |   | 2S    | -0.01779 |
|    |   | 3PX   | -0.03910 |
|    |   | 3PY   | 0.03832  |
|    |   | 3PZ   | 0.12933  |
|    |   | 4PX   | -0.06121 |
|    |   | 4PY   | 0.07211  |
|    |   | 4PZ   | 0.19250  |
| 25 | S | 1S    | 0.00068  |
|    |   | 2S    | 0.00959  |
|    |   | 3PX   | -0.02179 |
|    |   | 3PY   | -0.16246 |
|    |   | 3PZ   | -0.03894 |
|    |   | 4PX   | -0.02993 |
|    |   | 4PY   | -0.23821 |
|    |   | 4PZ   | -0.07082 |
| 26 | S | 1S    | -0.03400 |
|    |   | 2S    | -0.06177 |
|    |   | 3PX   | -0.04754 |
|    |   | 3PY   | -0.00564 |
|    |   | 3PZ   | -0.14085 |
|    |   | 4PX   | -0.07443 |
|    |   | 4PY   | -0.02465 |
|    |   | 4PZ   | -0.22911 |
| 30 | S | 1S    | -0.02277 |
|    |   | 2S    | -0.04642 |
|    |   | 3PX   | 0.09692  |
|    |   | 3PY   | 0.12287  |
|    |   | 3PZ   | 0.02258  |
|    |   | 4PX   | 0.14965  |
|    |   | 4PY   | 0.20636  |
|    |   | 4PZ   | 0.03717  |
|    |   | ..... |          |

**Ground-to-excited-state transition electric dipole moments (a.u.):**

| state | X       | Y       | Z       | Osc.   |
|-------|---------|---------|---------|--------|
| 1     | 0.0161  | 0.0085  | 0.0064  | 0.0000 |
| 2     | -0.0198 | -0.0107 | -0.0076 | 0.0000 |
| 3     | -0.0014 | 0.0096  | 0.0015  | 0.0000 |
| 4     | 0.0066  | 0.0035  | 0.0027  | 0.0000 |
| 5     | 0.0005  | -0.0046 | -0.0005 | 0.0000 |
| 6     | 0.0023  | 0.0022  | 0.0007  | 0.0000 |
| 7     | -0.0088 | -0.0102 | -0.0118 | 0.0000 |
| 8     | 0.0030  | -0.0121 | -0.0020 | 0.0000 |
| 9     | 0.0215  | 0.0153  | 0.0183  | 0.0000 |
| 10    | 0.0381  | 0.0180  | 0.0374  | 0.0001 |
| 11    | -0.0006 | 0.0006  | -0.0005 | 0.0000 |
| 12    | -0.0062 | -0.0020 | 0.0007  | 0.0000 |
| 13    | 0.0049  | -0.0056 | -0.0083 | 0.0000 |
| 14    | -0.0098 | -0.0002 | -0.0089 | 0.0000 |
| 15    | -0.0032 | -0.0017 | -0.0014 | 0.0000 |
| 16    | 0.0013  | 0.0006  | 0.0014  | 0.0000 |
| 17    | -0.0039 | -0.0014 | -0.0027 | 0.0000 |
| 18    | -0.0032 | -0.0023 | -0.0015 | 0.0000 |
| 19    | 0.1070  | -0.1870 | 0.0037  | 0.0022 |
| 20    | -0.0398 | 0.0827  | -0.0291 | 0.0004 |
| 21    | -0.0094 | -0.0065 | -0.0045 | 0.0000 |
| 22    | -0.0379 | 0.0133  | -0.0204 | 0.0001 |
| 23    | 0.0617  | 0.0270  | 0.0444  | 0.0003 |
| 24    | -0.0028 | 0.0057  | 0.0084  | 0.0000 |
| 25    | 0.0194  | 0.0082  | 0.0123  | 0.0000 |
| 26    | 0.0743  | 0.0352  | 0.0587  | 0.0005 |
| 27    | -0.0106 | -0.0043 | -0.0041 | 0.0000 |
| 28    | -0.0002 | -0.0053 | -0.0011 | 0.0000 |
| 29    | -0.0448 | 0.0791  | -0.0369 | 0.0005 |
| 30    | 0.0467  | -0.1165 | 0.0280  | 0.0009 |
| 31    | -0.0332 | -0.0348 | -0.0481 | 0.0002 |
| 32    | 0.0543  | -0.0888 | -0.0056 | 0.0006 |
| 33    | -0.0043 | 0.0013  | 0.0048  | 0.0000 |
| 34    | 0.0044  | 0.0001  | 0.0016  | 0.0000 |
| 35    | 0.0023  | -0.0005 | 0.0012  | 0.0000 |
| 36    | 0.0031  | -0.0035 | -0.0053 | 0.0000 |
| 37    | 0.0018  | -0.0013 | 0.0024  | 0.0000 |
| 38    | 0.0107  | -0.0206 | -0.2162 | 0.0026 |
| 39    | 0.0035  | 0.0007  | -0.0020 | 0.0000 |
| 40    | -0.0016 | -0.0006 | -0.0021 | 0.0000 |
| 41    | 0.0169  | 0.0098  | -0.0077 | 0.0000 |
| 42    | 0.0076  | -0.0226 | 0.0123  | 0.0000 |
| 43    | -0.0495 | -0.0106 | -0.0306 | 0.0002 |
| 44    | 0.0056  | 0.0025  | 0.0025  | 0.0000 |
| 45    | 0.0052  | -0.0109 | -0.0083 | 0.0000 |
| 46    | 0.0111  | -0.0094 | -0.0003 | 0.0000 |
| 47    | -0.2519 | 0.2481  | -0.0497 | 0.0073 |
| 48    | 0.0608  | 0.1267  | -0.0639 | 0.0014 |
| 49    | -0.1141 | 0.0259  | -0.0404 | 0.0009 |
| 50    | -0.0224 | -0.0296 | 0.0519  | 0.0002 |
| 51    | -0.0004 | -0.1391 | 0.1269  | 0.0020 |

|     |         |         |         |        |
|-----|---------|---------|---------|--------|
| 52  | 0.0340  | -0.0236 | 0.0198  | 0.0001 |
| 53  | 0.1598  | -0.1459 | -0.0417 | 0.0029 |
| 54  | -0.0756 | -0.1871 | 0.0347  | 0.0025 |
| 55  | -0.0004 | 0.0021  | -0.0016 | 0.0000 |
| 56  | 0.0484  | -0.0026 | -0.1112 | 0.0009 |
| 57  | -0.0229 | -0.0008 | -0.0084 | 0.0000 |
| 58  | 0.1698  | -0.1818 | -0.1277 | 0.0047 |
| 59  | -0.0003 | 0.0005  | 0.0029  | 0.0000 |
| 60  | 0.0070  | 0.0144  | 0.0089  | 0.0000 |
| 61  | -0.3646 | -0.3105 | -0.2725 | 0.0183 |
| 62  | -0.2111 | -0.1742 | -0.1146 | 0.0053 |
| 63  | 0.0332  | 0.0165  | 0.0963  | 0.0006 |
| 64  | -0.0094 | 0.0174  | -0.0068 | 0.0000 |
| 65  | 0.0257  | 0.0907  | 0.0671  | 0.0008 |
| 66  | 0.1766  | 0.1119  | 0.0696  | 0.0030 |
| 67  | -0.0004 | 0.0009  | 0.0013  | 0.0000 |
| 68  | -0.0427 | 0.0138  | -0.0376 | 0.0002 |
| 69  | -0.0371 | 0.2876  | 0.0785  | 0.0057 |
| 70  | -0.0459 | -0.0525 | 0.1148  | 0.0011 |
| 71  | 0.0310  | -0.1689 | -0.0608 | 0.0021 |
| 72  | 0.1549  | 0.1227  | 0.1454  | 0.0038 |
| 73  | 0.1434  | -0.0617 | 0.2781  | 0.0065 |
| 74  | -0.0214 | -0.1302 | 0.1401  | 0.0024 |
| 75  | -0.0015 | 0.0058  | 0.0050  | 0.0000 |
| 76  | -0.0283 | 0.0252  | -0.2495 | 0.0041 |
| 77  | -0.0261 | 0.0959  | 0.0418  | 0.0008 |
| 78  | -0.0308 | 0.0139  | -0.0015 | 0.0001 |
| 79  | 0.0005  | -0.0164 | -0.1313 | 0.0011 |
| 80  | -0.0327 | 0.0638  | 0.0202  | 0.0004 |
| 81  | 0.0452  | 0.0054  | 0.0163  | 0.0002 |
| 82  | -0.0069 | 0.0132  | 0.0050  | 0.0000 |
| 83  | -0.0874 | -0.0798 | 0.1000  | 0.0016 |
| 84  | 0.0018  | 0.0000  | -0.0027 | 0.0000 |
| 85  | 0.0794  | -0.1129 | 0.1107  | 0.0021 |
| 86  | 0.1222  | 0.1872  | -0.2131 | 0.0063 |
| 87  | 0.0982  | 0.0722  | 0.0693  | 0.0013 |
| 88  | 0.2396  | -0.2722 | -0.0005 | 0.0088 |
| 89  | -0.0129 | -0.0314 | -0.0174 | 0.0001 |
| 90  | 0.0319  | 0.0254  | 0.0112  | 0.0001 |
| 91  | 0.0739  | 0.0914  | -0.0558 | 0.0011 |
| 92  | -0.1750 | 0.0803  | 0.0079  | 0.0025 |
| 93  | 0.3426  | -0.0726 | 0.0547  | 0.0085 |
| 94  | -0.3188 | -0.0276 | 0.0370  | 0.0070 |
| 95  | 0.2066  | -0.1062 | 0.0445  | 0.0038 |
| 96  | 0.1043  | -0.1166 | 0.1901  | 0.0041 |
| 97  | -0.0050 | 0.0110  | 0.1624  | 0.0018 |
| 98  | 0.2678  | 0.3246  | -0.2970 | 0.0180 |
| 99  | 0.1551  | -0.1009 | 0.1440  | 0.0037 |
| 100 | 0.0474  | 0.1913  | -0.0395 | 0.0028 |
| 101 | 0.2516  | -0.1445 | -0.0792 | 0.0062 |
| 102 | -0.0021 | -0.0067 | -0.0021 | 0.0000 |
| 103 | -0.0241 | 0.0278  | -0.0091 | 0.0001 |
| 104 | 0.0763  | 0.0333  | 0.0020  | 0.0005 |

|     |         |         |         |        |
|-----|---------|---------|---------|--------|
| 105 | -0.1289 | -0.3504 | 0.1849  | 0.0121 |
| 106 | -0.1290 | 0.0883  | -0.0731 | 0.0021 |
| 107 | -0.0522 | -0.3483 | 0.1715  | 0.0108 |
| 108 | -0.1225 | 0.1285  | -0.0665 | 0.0025 |
| 109 | -0.0015 | 0.0397  | -0.0605 | 0.0004 |
| 110 | -0.4984 | 0.0210  | 0.0339  | 0.0176 |
| 111 | -0.0817 | -0.1132 | 0.0971  | 0.0020 |
| 112 | -0.0079 | 0.0027  | 0.0066  | 0.0000 |
| 113 | -0.3189 | 0.1284  | 0.2637  | 0.0133 |
| 114 | 0.1037  | 0.1117  | 0.0396  | 0.0018 |
| 115 | 0.0773  | -0.2452 | 0.1039  | 0.0055 |
| 116 | -0.0832 | -0.0302 | -0.0085 | 0.0006 |
| 117 | 0.1283  | -0.0564 | 0.0347  | 0.0015 |
| 118 | -0.0278 | -0.0326 | -0.0280 | 0.0002 |
| 119 | 0.0532  | -0.0141 | -0.0324 | 0.0003 |
| 120 | -0.0138 | -0.1186 | 0.0003  | 0.0010 |
| 121 | -0.1441 | -0.0084 | 0.1207  | 0.0025 |
| 122 | 0.0714  | -0.0493 | 0.1465  | 0.0021 |
| 123 | -0.0155 | -0.0029 | 0.0323  | 0.0001 |
| 124 | 0.1351  | -0.0336 | 0.0387  | 0.0015 |
| 125 | 0.3170  | 0.0369  | 0.0477  | 0.0075 |
| 126 | 0.0252  | -0.0035 | 0.0057  | 0.0000 |
| 127 | 0.0018  | 0.0010  | 0.0010  | 0.0000 |
| 128 | -0.1755 | -0.1448 | -0.1965 | 0.0066 |
| 129 | -0.3641 | -0.1293 | -0.0055 | 0.0109 |
| 130 | -0.0075 | -0.0058 | -0.0039 | 0.0000 |
| 131 | -0.0154 | -0.0658 | -0.0128 | 0.0003 |
| 132 | 0.3850  | 0.0760  | 0.3713  | 0.0215 |
| 133 | 0.1288  | 0.0075  | -0.0230 | 0.0013 |
| 134 | -0.0817 | 0.0956  | 0.0356  | 0.0013 |
| 135 | 0.0012  | 0.0020  | 0.0206  | 0.0000 |
| 136 | 0.0861  | 0.0331  | 0.0060  | 0.0006 |
| 137 | -0.0157 | 0.0049  | 0.0375  | 0.0001 |
| 138 | -0.1599 | -0.1295 | 0.0237  | 0.0032 |
| 139 | -0.0032 | -0.0003 | -0.0001 | 0.0000 |
| 140 | 0.0539  | 0.2208  | 0.0182  | 0.0039 |
| 141 | -0.0035 | 0.0108  | 0.0166  | 0.0000 |
| 142 | 0.0854  | -0.0238 | 0.0016  | 0.0006 |
| 143 | 0.0057  | -0.0017 | 0.0001  | 0.0000 |
| 144 | -0.0033 | -0.0020 | -0.0027 | 0.0000 |
| 145 | 0.0014  | 0.0012  | -0.0036 | 0.0000 |
| 146 | 0.0690  | -0.1391 | 0.0488  | 0.0020 |
| 147 | 0.0820  | -0.0593 | 0.0444  | 0.0009 |
| 148 | -0.1044 | 0.0809  | -0.0353 | 0.0014 |
| 149 | 0.0245  | -0.0119 | -0.0041 | 0.0001 |
| 150 | -0.1556 | 0.1977  | 0.2750  | 0.0106 |
| 151 | -0.0156 | 0.0098  | -0.0074 | 0.0000 |
| 152 | -0.0037 | -0.0007 | -0.0020 | 0.0000 |
| 153 | 0.0188  | -0.0441 | -0.0011 | 0.0002 |
| 154 | 0.0019  | -0.0008 | 0.0005  | 0.0000 |
| 155 | 0.0999  | -0.0641 | -0.0194 | 0.0011 |
| 156 | -0.1725 | -0.1885 | 0.1992  | 0.0081 |
| 157 | 0.0379  | -0.0128 | -0.0130 | 0.0001 |



|     |         |         |         |        |
|-----|---------|---------|---------|--------|
| 158 | -0.2617 | 0.2740  | 0.1656  | 0.0133 |
| 159 | 0.0757  | 0.0223  | -0.0296 | 0.0006 |
| 160 | -0.0435 | 0.0354  | 0.0225  | 0.0003 |
| 161 | 0.0872  | -0.0443 | -0.0450 | 0.0009 |
| 162 | -0.0728 | 0.0691  | 0.0329  | 0.0009 |
| 163 | -0.0135 | 0.0102  | 0.0051  | 0.0000 |
| 164 | 0.0039  | 0.0012  | -0.0024 | 0.0000 |
| 165 | 0.0863  | -0.0356 | -0.0197 | 0.0007 |
| 166 | 0.0031  | -0.0011 | -0.0016 | 0.0000 |
| 167 | 0.0110  | 0.0077  | -0.0097 | 0.0000 |
| 168 | 0.0146  | 0.0306  | -0.0501 | 0.0003 |
| 169 | -0.0027 | 0.0080  | 0.0000  | 0.0000 |
| 170 | 0.0503  | -0.0031 | 0.0139  | 0.0002 |
| 171 | 0.0038  | 0.0014  | -0.0014 | 0.0000 |
| 172 | 0.0022  | -0.0034 | -0.0001 | 0.0000 |
| 173 | -0.0077 | 0.0022  | -0.0049 | 0.0000 |
| 174 | 0.3265  | -0.0645 | -0.1698 | 0.0112 |
| 175 | -0.0419 | -0.0123 | -0.0397 | 0.0003 |
| 176 | 0.0134  | 0.0334  | 0.0027  | 0.0001 |
| 177 | -0.0335 | -0.0216 | -0.0028 | 0.0001 |
| 178 | 0.0328  | 0.0359  | 0.0313  | 0.0003 |
| 179 | 0.0031  | -0.0122 | -0.0059 | 0.0000 |
| 180 | 0.0033  | 0.0094  | -0.0037 | 0.0000 |
| 181 | -0.0241 | -0.0048 | -0.0065 | 0.0001 |
| 182 | 0.1000  | -0.0398 | -0.1120 | 0.0020 |
| 183 | 0.0535  | -0.0066 | 0.0148  | 0.0003 |
| 184 | 0.0350  | -0.0145 | 0.0271  | 0.0002 |
| 185 | -0.0107 | 0.0047  | -0.0055 | 0.0000 |
| 186 | -0.0642 | -0.0336 | -0.0380 | 0.0005 |
| 187 | -0.0871 | -0.0253 | -0.0505 | 0.0009 |
| 188 | 0.0014  | -0.0022 | -0.0015 | 0.0000 |
| 189 | -0.0072 | -0.0084 | -0.0030 | 0.0000 |
| 190 | 0.0040  | -0.0004 | 0.0010  | 0.0000 |
| 191 | 0.0207  | 0.0248  | 0.0027  | 0.0001 |
| 192 | 0.0032  | -0.0053 | -0.0061 | 0.0000 |
| 193 | 0.0105  | 0.0029  | 0.0028  | 0.0000 |
| 194 | -0.0623 | 0.0083  | -0.0180 | 0.0004 |
| 195 | -0.1063 | -0.0748 | -0.0985 | 0.0022 |
| 196 | 0.0011  | 0.0015  | 0.0007  | 0.0000 |
| 197 | -0.0536 | -0.0178 | -0.0107 | 0.0003 |
| 198 | -0.0074 | -0.0314 | -0.0095 | 0.0001 |
| 199 | -0.0568 | 0.0505  | 0.0723  | 0.0009 |
| 200 | 0.0617  | -0.1015 | 0.0436  | 0.0013 |
